# Supplementary material
Source: bioRxiv or medRxiv preprint supplement (https://medrxiv.org/highwire/filestream/75304/field_highwire_adjunct_files/0/2020.04.02.20051136-1.pdf)
Supplement: Supplementary file [file 2020.04.02.20051136-1.pdf]

| <b>ID</b> | <b>Dataset</b> | <b>Diagnosis</b> | <b>Age</b> | <b>Sex</b> | <b>Alanine transaminase</b> |
|-----------|----------------|------------------|------------|------------|-----------------------------|
| 1         | Training set   | COVID-19         | 78         | male       | 19                          |
| 2         | Training set   | COVID-19         | 78         | male       | 105                         |
| 3         | Training set   | COVID-19         | 78         | male       | 27                          |
| 4         | Training set   | COVID-19         | 78         | male       | 8                           |
| 5         | Training set   | COVID-19         | 43         | female     | 27                          |
| 6         | Training set   | COVID-19         | 32         | female     | 40                          |
| 7         | Training set   | COVID-19         | 32         | female     | 155                         |
| 8         | Training set   | COVID-19         | 32         | female     | 137                         |
| 9         | Training set   | COVID-19         | 66         | male       | 66                          |
| 10        | Training set   | COVID-19         | 66         | male       | 47                          |
| 11        | Training set   | COVID-19         | 63         | male       | 27                          |
| 12        | Training set   | COVID-19         | 63         | male       | 26                          |
| 13        | Training set   | COVID-19         | 63         | male       | 61                          |
| 14        | Training set   | COVID-19         | 63         | male       | 96                          |
| 15        | Training set   | COVID-19         | 63         | male       | 92                          |
| 16        | Training set   | COVID-19         | 68         | female     | 11                          |
| 17        | Training set   | COVID-19         | 68         | female     | 14                          |
| 18        | Training set   | COVID-19         | 68         | female     | 24                          |
| 19        | Training set   | COVID-19         | 44         | female     | 105                         |
| 20        | Training set   | COVID-19         | 44         | female     | 105                         |
| 21        | Training set   | COVID-19         | 44         | female     | 122                         |
| 22        | Training set   | COVID-19         | 44         | female     | 105                         |
| 23        | Training set   | COVID-19         | 44         | female     | 105                         |
| 24        | Training set   | COVID-19         | 44         | female     | 105                         |
| 25        | Training set   | COVID-19         | 44         | female     | 40                          |
| 26        | Training set   | COVID-19         | 44         | female     | 105                         |
| 27        | Training set   | COVID-19         | 44         | female     | 53                          |
| 28        | Training set   | COVID-19         | 44         | female     | 81                          |
| 29        | Training set   | COVID-19         | 44         | female     | 45                          |
| 30        | Training set   | COVID-19         | 44         | female     | 27                          |
| 31        | Training set   | COVID-19         | 44         | female     | 1452                        |
| 32        | Training set   | COVID-19         | 44         | female     | 105                         |
| 33        | Training set   | COVID-19         | 73         | male       | 85                          |
| 34        | Training set   | COVID-19         | 73         | male       | 4694                        |
| 35        | Training set   | COVID-19         | 82         | male       | 22                          |
| 36        | Training set   | COVID-19         | 82         | male       | 23                          |
| 37        | Training set   | COVID-19         | 82         | male       | 31                          |
| 38        | Training set   | COVID-19         | 82         | male       | 105                         |
| 39        | Training set   | COVID-19         | 31         | male       | 15                          |
| 40        | Training set   | COVID-19         | 31         | male       | 14                          |
| 41        | Training set   | COVID-19         | 31         | male       | 3                           |
| 42        | Training set   | COVID-19         | 31         | male       | 2                           |
| 43        | Training set   | COVID-19         | 31         | male       | 10                          |
| 44        | Training set   | COVID-19         | 31         | male       | 7                           |
| 45        | Training set   | COVID-19         | 1          | male       | 105                         |
| 46        | Training set   | COVID-19         | 1          | male       | 10                          |
| 47        | Training set   | COVID-19         | 1          | male       | 9                           |
| 48        | Training set   | COVID-19         | 1          | male       | 10                          |
| 49        | Training set   | COVID-19         | 33         | female     | 47                          |
| 50        | Training set   | COVID-19         | 33         | female     | 85                          |

|     |              |           |           |      |
|-----|--------------|-----------|-----------|------|
| 51  | Training set | Pneumonia | 79 male   | 15   |
| 52  | Training set | Pneumonia | 63 male   | 24.1 |
| 53  | Training set | Pneumonia | 80 male   | 28.2 |
| 54  | Training set | Pneumonia | 80 female | 17.9 |
| 55  | Training set | Pneumonia | 81 female | 20.5 |
| 56  | Training set | Pneumonia | 53 female | 52.4 |
| 57  | Training set | Pneumonia | 77 male   | 16.3 |
| 58  | Training set | Pneumonia | 54 female | 16.3 |
| 59  | Training set | Pneumonia | 85 female | 18.2 |
| 60  | Training set | Pneumonia | 80 male   | 32.3 |
| 61  | Training set | Pneumonia | 56 female | 22.7 |
| 62  | Training set | Pneumonia | 80 male   | 31.2 |
| 63  | Training set | Pneumonia | 77 male   | 21   |
| 64  | Training set | Pneumonia | 70 male   | 15.8 |
| 65  | Training set | Pneumonia | 83 female | 13.8 |
| 66  | Training set | Pneumonia | 72 female | 9.2  |
| 67  | Training set | Pneumonia | 41 male   | 45.7 |
| 68  | Training set | Pneumonia | 63 male   | 19   |
| 69  | Training set | Pneumonia | 83 male   | 17.3 |
| 70  | Training set | Pneumonia | 81 male   | 24.5 |
| 71  | Training set | Pneumonia | 64 female | 25   |
| 72  | Training set | Pneumonia | 69 female | 33   |
| 73  | Training set | Pneumonia | 79 male   | 9    |
| 74  | Training set | Pneumonia | 75 male   | 7    |
| 75  | Training set | Pneumonia | 55 male   | 10   |
| 76  | Training set | Pneumonia | 58 male   | 22   |
| 77  | Training set | Pneumonia | 65 female | 26   |
| 78  | Training set | Pneumonia | 63 male   | 10   |
| 79  | Training set | Pneumonia | 56 male   | 14   |
| 80  | Training set | Pneumonia | 74 male   | 10   |
| 81  | Training set | Pneumonia | 27 male   | 31   |
| 82  | Training set | Pneumonia | 81 male   | 12   |
| 83  | Training set | Pneumonia | 68 female | 14   |
| 84  | Training set | Pneumonia | 32 female | 7    |
| 85  | Training set | Pneumonia | 56 male   | 35   |
| 86  | Training set | Pneumonia | 56 female | 17   |
| 87  | Training set | Pneumonia | 90 male   | 18   |
| 88  | Training set | Pneumonia | 68 male   | 22   |
| 89  | Training set | Pneumonia | 30 male   | 33   |
| 90  | Training set | Pneumonia | 41 female | 18   |
| 91  | Training set | Pneumonia | 66 female | 153  |
| 92  | Training set | Pneumonia | 52 female | 32   |
| 93  | Training set | Pneumonia | 70 female | 122  |
| 94  | Training set | Pneumonia | 32 male   | 28   |
| 95  | Training set | Pneumonia | 73 male   | 10   |
| 96  | Training set | Pneumonia | 47 male   | 26   |
| 97  | Training set | Pneumonia | 25 female | 141  |
| 98  | Training set | Pneumonia | 17 male   | 44   |
| 99  | Training set | Pneumonia | 65 female | 36.7 |
| 100 | Training set | Pneumonia | 16 female | 47   |
| 101 | Training set | Pneumonia | 60 female | 93   |

|     |              |              |           |      |
|-----|--------------|--------------|-----------|------|
| 102 | Training set | Pneumonia    | 30 male   | 10   |
| 103 | Training set | Pneumonia    | 65 female | 28   |
| 104 | Training set | Pneumonia    | 69 female | 36.7 |
| 105 | Training set | Pneumonia    | 15 male   | 11   |
| 106 | Training set | Pneumonia    | 34 male   | 15   |
| 107 | Training set | Pneumonia    | 54 female | 34   |
| 108 | Training set | Pneumonia    | 16 female | 26   |
| 109 | Training set | Pneumonia    | 66 female | 31   |
| 110 | Training set | Pneumonia    | 66 female | 25   |
| 111 | Training set | Pneumonia    | 57 male   | 161  |
| 112 | Training set | Pneumonia    | 51 male   | 40   |
| 113 | Training set | Pneumonia    | 61 male   | 17   |
| 114 | Training set | Pneumonia    | 86 male   | 12   |
| 115 | Training set | Pneumonia    | 76 male   | 35   |
| 116 | Training set | Pneumonia    | 40 female | 166  |
| 117 | Training set | Pneumonia    | 15 male   | 36.7 |
| 118 | Training set | Pneumonia    | 69 female | 43   |
| 119 | Training set | Pneumonia    | 87 female | 18   |
| 120 | Training set | Pneumonia    | 53 male   | 36.7 |
| 121 | Training set | Pneumonia    | 66 female | 47   |
| 122 | Training set | Pneumonia    | 59 female | 54   |
| 123 | Training set | Pneumonia    | 80 male   | 16   |
| 124 | Training set | Pneumonia    | 80 female | 36.7 |
| 125 | Training set | Pneumonia    | 81 female | 14   |
| 126 | Training set | Pneumonia    | 67 female | 27   |
| 127 | Training set | Tuberculosis | 41 male   | 57   |
| 128 | Training set | Tuberculosis | 73 male   | 0    |
| 129 | Training set | Tuberculosis | 24 female | 9    |
| 130 | Training set | Tuberculosis | 73 male   | 49   |
| 131 | Training set | Tuberculosis | 47 female | 26   |
| 132 | Training set | Tuberculosis | 78 male   | 9    |
| 133 | Training set | Tuberculosis | 65 female | 43   |
| 134 | Training set | Tuberculosis | 70 female | 34   |
| 135 | Training set | Tuberculosis | 48 male   | 18   |
| 136 | Training set | Tuberculosis | 33 female | 25   |
| 137 | Training set | Lung cancer  | 61 female | 11   |
| 138 | Training set | Lung cancer  | 69 female | 14   |
| 139 | Training set | Lung cancer  | 43 female | 50   |
| 140 | Training set | Lung cancer  | 73 female | 19   |
| 141 | Training set | Lung cancer  | 78 female | 18   |
| 142 | Training set | Lung cancer  | 55 male   | 7    |
| 143 | Training set | Lung cancer  | 80 female | 9    |
| 144 | Training set | Lung cancer  | 65 female | 37   |
| 145 | Training set | Lung cancer  | 69 female | 18   |
| 146 | Training set | Lung cancer  | 56 female | 25   |
| 147 | Tset set     | COVID-19     | 29 female | 48   |
| 148 | Tset set     | COVID-19     | 29 female | 31   |
| 149 | Tset set     | COVID-19     | 31 female | 18   |
| 150 | Tset set     | COVID-19     | 31 female | 46   |
| 151 | Tset set     | COVID-19     | 31 female | 50   |
| 152 | Tset set     | COVID-19     | 47 male   | 44   |

|     |          |              |           |      |
|-----|----------|--------------|-----------|------|
| 153 | Tset set | COVID-19     | 47 male   | 29   |
| 154 | Tset set | COVID-19     | 47 male   | 19   |
| 155 | Tset set | COVID-19     | 49 female | 23   |
| 156 | Tset set | COVID-19     | 49 female | 105  |
| 157 | Tset set | COVID-19     | 49 female | 33   |
| 158 | Tset set | COVID-19     | 65 male   | 10   |
| 159 | Tset set | COVID-19     | 65 male   | 11   |
| 160 | Tset set | COVID-19     | 65 male   | 51   |
| 161 | Tset set | COVID-19     | 65 male   | 65   |
| 162 | Tset set | Pneumonia    | 19 female | 36.7 |
| 163 | Tset set | Pneumonia    | 75 female | 100  |
| 164 | Tset set | Pneumonia    | 84 male   | 11   |
| 165 | Tset set | Pneumonia    | 40 female | 5    |
| 166 | Tset set | Pneumonia    | 36 male   | 313  |
| 167 | Tset set | Pneumonia    | 61 female | 54   |
| 168 | Tset set | Pneumonia    | 74 male   | 14   |
| 169 | Tset set | Pneumonia    | 82 male   | 7    |
| 170 | Tset set | Tuberculosis | 59 female | 16   |
| 171 | Tset set | Tuberculosis | 77 female | 10   |
| 172 | Tset set | Tuberculosis | 33 female | 19   |
| 173 | Tset set | Tuberculosis | 22 female | 12   |
| 174 | Tset set | Tuberculosis | 83 male   | 14   |
| 175 | Tset set | Lung cancer  | 76 female | 27   |
| 176 | Tset set | Lung cancer  | 66 male   | 18   |
| 177 | Tset set | Lung cancer  | 69 female | 19   |
| 178 | Tset set | Lung cancer  | 58 female | 51   |
| 179 | Tset set | Lung cancer  | 47 female | 29   |

| Aspartate aminotransferase | TotalProtein | Albumin | Globulin | Total bilirubin |
|----------------------------|--------------|---------|----------|-----------------|
| 40                         | 48           | 30      | 18       | 59.8            |
| 55                         | 62           | 37      | 25       | 25.2            |
| 27                         | 55           | 34      | 21       | 32.6            |
| 16                         | 58           | 37      | 21       | 21.9            |
| 22                         | 73           | 43      | 30       | 24              |
| 28                         | 63           | 35      | 28       | 15.3            |
| 49                         | 70           | 34      | 36       | 14.1            |
| 31                         | 60           | 34      | 26       | 36              |
| 41                         | 58           | 32      | 26       | 5.4             |
| 18                         | 51           | 31      | 20       | 30.2            |
| 30                         | 59           | 33      | 26       | 14.4            |
| 21                         | 56           | 32      | 24       | 11.6            |
| 46                         | 70           | 30      | 40       | 17.6            |
| 64                         | 55           | 30      | 25       | 13.9            |
| 68                         | 42           | 26      | 16       | 13.4            |
| 19                         | 61           | 36      | 25       | 47.2            |
| 23                         | 55           | 33      | 22       | 42.7            |
| 27                         | 60           | 37      | 23       | 34.2            |
| 55                         | 62           | 37      | 25       | 25.2            |
| 55                         | 62           | 37      | 25       | 25.2            |
| 50                         | 55           | 25      | 30       | 19.8            |
| 55                         | 62           | 37      | 25       | 25.2            |
| 55                         | 62           | 37      | 25       | 25.2            |
| 55                         | 62           | 37      | 25       | 25.2            |
| 20                         | 45           | 27      | 18       | 18.1            |
| 55                         | 62           | 37      | 25       | 25.2            |
| 38                         | 43           | 28      | 15       | 73.9            |
| 49                         | 48           | 32      | 16       | 123             |
| 23                         | 51           | 32      | 19       | 101             |
| 20                         | 55           | 33      | 22       | 149.2           |
| 2501                       | 43           | 29      | 14       | 184.9           |
| 55                         | 62           | 37      | 25       | 25.2            |
| 55                         | 60           | 35      | 25       | 22.6            |
| 21                         | 67           | 24      | 43       | 39.5            |
| 25                         | 62           | 38      | 24       | 9.5             |
| 26                         | 62           | 33      | 29       | 24.2            |
| 21                         | 62           | 33      | 29       | 30.8            |
| 55                         | 62           | 37      | 25       | 25.2            |
| 30                         | 72           | 45      | 27       | 19.3            |
| 29                         | 78           | 48      | 30       | 36.1            |
| 13                         | 59           | 38      | 21       | 2.3             |
| 6                          | 59           | 39      | 20       | 20.9            |
| 17                         | 59           | 38      | 21       | 22.9            |
| 17                         | 60           | 39      | 21       | 11.3            |
| 55                         | 62           | 37      | 25       | 25.2            |
| 44                         | 73           | 47      | 26       | 6.3             |
| 47                         | 69           | 45      | 24       | 6.1             |
| 44                         | 66           | 45      | 21       | 7.2             |
| 34                         | 67           | 41      | 26       | 12.6            |
| 38                         | 60           | 34      | 26       | 13.7            |

|      |      |      |      |      |
|------|------|------|------|------|
| 4.8  | 71   | 43.2 | 27.8 | 8.2  |
| 15.7 | 73.5 | 38.6 | 34.9 | 41.2 |
| 11.8 | 59.5 | 37   | 22.5 | 136  |
| 10.3 | 67.6 | 48.1 | 19.5 | 13.3 |
| 28.1 | 60.5 | 29   | 31.5 | 8.7  |
| 48.5 | 61.5 | 31.2 | 30.3 | 46.1 |
| 14.7 | 61.8 | 29.4 | 22.4 | 20.8 |
| 18   | 68.6 | 39.3 | 29.3 | 37.8 |
| 10.7 | 74.9 | 39.9 | 35   | 48.4 |
| 17   | 63.6 | 40.5 | 23.1 | 7.4  |
| 16   | 66.9 | 32.9 | 34   | 14.8 |
| 11.3 | 71.7 | 43.3 | 28.4 | 11.9 |
| 34.7 | 58.6 | 28.2 | 30.4 | 10.6 |
| 2.4  | 60.6 | 33.7 | 26.9 | 18.3 |
| 7.3  | 76.2 | 40.8 | 35.4 | 12.9 |
| 5.4  | 68.2 | 28.5 | 39.7 | 10.5 |
| 65.4 | 74.5 | 42.1 | 32.4 | 10.2 |
| 13.7 | 77.4 | 43.5 | 33.9 | 14.2 |
| 13.8 | 73.3 | 41.4 | 31.9 | 15.5 |
| 18.4 | 67.1 | 40.7 | 26.4 | 23.2 |
| 27   | 68.8 | 36.9 | 31.9 | 6.8  |
| 45   | 64.9 | 40.8 | 24.1 | 11.2 |
| 33   | 73.2 | 36.7 | 36.5 | 9.4  |
| 16   | 61   | 40.7 | 20.3 | 20.7 |
| 15   | 71.4 | 44   | 27.4 | 14.1 |
| 28   | 59.6 | 38.6 | 21   | 7    |
| 17   | 67   | 42.3 | 24.7 | 18.1 |
| 10   | 61.4 | 38.6 | 22.8 | 12.5 |
| 16   | 69.1 | 45.8 | 23.3 | 8.1  |
| 15   | 63.6 | 39.2 | 24.4 | 12   |
| 19   | 77.5 | 42   | 35.5 | 4.3  |
| 19   | 59.1 | 37.1 | 22   | 52.9 |
| 18   | 71.9 | 44.3 | 27.6 | 9    |
| 14   | 65.8 | 38.7 | 27.1 | 18.6 |
| 28   | 63.6 | 33.7 | 29.9 | 8.3  |
| 19   | 71.3 | 44.8 | 26.5 | 11.6 |
| 24   | 74.4 | 42.9 | 31.5 | 4.8  |
| 28   | 65.6 | 40.6 | 25   | 4.7  |
| 26   | 74.1 | 43.1 | 31   | 13.8 |
| 18   | 58   | 37.8 | 20.2 | 10.8 |
| 92   | 55.2 | 31.8 | 23.4 | 22.9 |
| 19   | 66.9 | 42.5 | 24.4 | 14.2 |
| 64   | 72.7 | 43.2 | 29.5 | 24   |
| 23   | 81.9 | 50.3 | 31.6 | 17.7 |
| 16   | 62.7 | 42.5 | 20.2 | 20.3 |
| 29   | 74.4 | 46.5 | 27.9 | 12.3 |
| 60   | 64.6 | 42.7 | 21.9 | 21.4 |
| 18   | 69.6 | 42.1 | 27.5 | 8.1  |
| 31   | 68.1 | 39.7 | 27.9 | 19.5 |
| 58   | 76.6 | 41.3 | 35.5 | 9.6  |
| 71   | 52.3 | 30.2 | 22.1 | 14.4 |

|     |      |      |      |      |
|-----|------|------|------|------|
| 15  | 81.6 | 48.9 | 32.7 | 17.2 |
| 23  | 45.3 | 32.5 | 12.8 | 7.9  |
| 31  | 68.1 | 39.7 | 27.9 | 19.5 |
| 14  | 82.4 | 48.7 | 33.7 | 9.8  |
| 17  | 66.7 | 40.6 | 26.1 | 5.8  |
| 22  | 80.9 | 48.8 | 32.1 | 16.4 |
| 25  | 69.9 | 47.3 | 22.6 | 12.1 |
| 28  | 94.8 | 43.4 | 21.4 | 8.4  |
| 24  | 57.8 | 38.8 | 19   | 12.3 |
| 55  | 68.7 | 39.1 | 29.6 | 11.3 |
| 32  | 74.2 | 43.5 | 30.7 | 20.3 |
| 10  | 64.5 | 30.8 | 33.7 | 12.2 |
| 31  | 65.8 | 37.8 | 28   | 15.6 |
| 32  | 67.5 | 36   | 31.5 | 22.4 |
| 78  | 78.7 | 43.3 | 35.4 | 16.6 |
| 31  | 68.1 | 39.7 | 27.9 | 19.5 |
| 20  | 68.7 | 40.1 | 28.6 | 11   |
| 20  | 61.6 | 35.8 | 25.8 | 13.8 |
| 31  | 68.1 | 39.7 | 27.9 | 19.5 |
| 42  | 60.6 | 35.4 | 25.2 | 19   |
| 101 | 50.3 | 23.7 | 26.6 | 11.9 |
| 17  | 72   | 42.4 | 29.6 | 3.1  |
| 31  | 68.1 | 39.7 | 27.9 | 19.5 |
| 13  | 67.3 | 41.8 | 25.5 | 12.6 |
| 26  | 71.6 | 42   | 29.6 | 20.1 |
| 46  | 69.9 | 36.9 | 33   | 16.2 |
| 5   | 82.4 | 40.2 | 42.2 | 3.8  |
| 14  | 63.1 | 38.8 | 24.3 | 3.5  |
| 27  | 67.2 | 36.1 | 31.1 | 3.9  |
| 17  | 71.5 | 37.7 | 33.8 | 15.7 |
| 10  | 61   | 40.5 | 20.5 | 7.4  |
| 13  | 69.5 | 41.9 | 27.6 | 15.3 |
| 30  | 59.9 | 27.6 | 32.3 | 41.4 |
| 18  | 68.6 | 36   | 32.6 | 4.6  |
| 23  | 83.3 | 49.5 | 33.8 | 10.8 |
| 18  | 69   | 43   | 26   | 8    |
| 28  | 67.4 | 39.2 | 28.8 | 4.2  |
| 52  | 69.4 | 41.8 | 27.6 | 9.8  |
| 22  | 66   | 39.2 | 28.8 | 13.9 |
| 34  | 65.8 | 38.1 | 27.7 | 16.6 |
| 16  | 75.5 | 41.2 | 34.3 | 7    |
| 21  | 65.2 | 37   | 28.2 | 7.9  |
| 27  | 67.2 | 39.2 | 28.8 | 12.4 |
| 29  | 81.6 | 47.4 | 34.2 | 18.5 |
| 26  | 59.8 | 39.2 | 28.8 | 23.5 |
| 29  | 75   | 48   | 27   | 11.7 |
| 20  | 70   | 46   | 24   | 38.5 |
| 18  | 67   | 43   | 24   | 17.9 |
| 29  | 59   | 39   | 20   | 30.7 |
| 26  | 75   | 48   | 27   | 22.8 |
| 25  | 66   | 35   | 31   | 30.5 |

|     |      |      |      |       |
|-----|------|------|------|-------|
| 22  | 65   | 36   | 29   | 30.3  |
| 22  | 61   | 32   | 29   | 20.7  |
| 29  | 61   | 37   | 24   | 11.3  |
| 55  | 62   | 37   | 25   | 25.2  |
| 16  | 49   | 31   | 18   | 12.9  |
| 19  | 62   | 38   | 24   | 10.7  |
| 17  | 58   | 36   | 22   | 11.7  |
| 25  | 55   | 35   | 20   | 28.3  |
| 29  | 50   | 32   | 18   | 12.1  |
| 31  | 68.1 | 39.7 | 27.9 | 19.5  |
| 102 | 69.2 | 46.1 | 23.1 | 122.3 |
| 24  | 70.2 | 39.7 | 30.5 | 9.7   |
| 10  | 66.9 | 40.7 | 26.2 | 13.3  |
| 315 | 73.3 | 39.7 | 33.6 | 119.5 |
| 37  | 69.4 | 39.9 | 29.5 | 13.7  |
| 15  | 63.6 | 37.3 | 26.3 | 12    |
| 13  | 69.9 | 37.8 | 32.1 | 14.3  |
| 16  | 61.9 | 36.2 | 25.7 | 9.9   |
| 10  | 75.1 | 43.4 | 31.7 | 10.5  |
| 19  | 76.1 | 42.9 | 33.2 | 4.6   |
| 18  | 75.9 | 44   | 31.9 | 2.1   |
| 19  | 71.6 | 31.5 | 40.1 | 7.5   |
| 18  | 74.6 | 41.3 | 33.3 | 7     |
| 21  | 69.6 | 39.1 | 30.5 | 7.2   |
| 19  | 66.1 | 38.9 | 27.2 | 12.3  |
| 33  | 80.3 | 41.4 | 38.9 | 10.1  |
| 22  | 82.5 | 47.7 | 34.8 | 16    |



| Direct bilirubin | Indirect bilirubin | Glucose | Carbamide | Creatinine | Uric acid | Calcium |      |
|------------------|--------------------|---------|-----------|------------|-----------|---------|------|
|                  | 28.4               | 31.4    | 9.3       | 6.3        | 58        | 237     | 2.05 |
|                  | 10.7               | 14.5    | 7.7       | 5.6        | 57        | 237     | 3.57 |
|                  | 14.4               | 18.2    | 11.3      | 10.2       | 54        | 237     | 2.06 |
|                  | 6.8                | 15.1    | 5.6       | 3.6        | 52        | 178     | 1.53 |
|                  | 7.2                | 16.8    | 6.3       | 4.4        | 73        | 415     | 3.57 |
|                  | 5.9                | 9.4     | 13        | 9.6        | 53        | 237     | 2.67 |
|                  | 4.9                | 9.2     | 3.7       | 8.4        | 68        | 305     | 3.57 |
|                  | 10.7               | 25.3    | 4.4       | 10.7       | 65        | 237     | 2.26 |
|                  | 2.5                | 2.9     | 5.7       | 5          | 60        | 264     | 1.31 |
|                  | 13.1               | 17.1    | 8.9       | 8.4        | 78        | 337     | 3.26 |
|                  | 5.4                | 9       | 12.1      | 10.9       | 61        | 237     | 2.25 |
|                  | 5.8                | 5.8     | 15.3      | 14.5       | 43        | 237     | 2.59 |
|                  | 7.3                | 10.3    | 14.1      | 14.4       | 53        | 279     | 2.3  |
|                  | 4.9                | 9       | 10.5      | 12.3       | 43        | 235     | 2.47 |
|                  | 5.4                | 8       | 12        | 9.6        | 34        | 237     | 2.23 |
|                  | 14.6               | 32.6    | 4.5       | 5.6        | 58        | 224     | 2.32 |
|                  | 12.4               | 30.3    | 4.5       | 3.7        | 58        | 201     | 2.25 |
|                  | 10.7               | 23.5    | 13.7      | 4.4        | 52        | 190     | 2.13 |
|                  | 10.7               | 14.5    | 7.7       | 5.6        | 57        | 237     | 3.57 |
|                  | 10.7               | 14.5    | 7.7       | 5.6        | 57        | 237     | 3.57 |
|                  | 9.7                | 10.1    | 9.7       | 6.5        | 37        | 237     | 1.92 |
|                  | 10.7               | 14.5    | 7.7       | 5.6        | 57        | 237     | 3.57 |
|                  | 10.7               | 14.5    | 7.7       | 5.6        | 57        | 237     | 3.57 |
|                  | 10.7               | 14.5    | 7.7       | 5.6        | 57        | 237     | 3.57 |
|                  | 8.1                | 10      | 11        | 8.7        | 30        | 75      | 2.31 |
|                  | 10.7               | 14.5    | 7.7       | 5.6        | 57        | 237     | 3.57 |
|                  | 47.1               | 26.8    | 6.1       | 8.7        | 30        | 237     | 2.47 |
|                  | 81.8               | 41.2    | 10.2      | 8.5        | 36        | 237     | 2.06 |
|                  | 61.1               | 39.9    | 10        | 6.7        | 29        | 149     | 2.72 |
|                  | 95.9               | 53.3    | 8.8       | 5.9        | 28        | 62      | 2.75 |
|                  | 121.3              | 63.6    | 7.6       | 9.8        | 62        | 237     | 2.83 |
|                  | 10.7               | 14.5    | 7.7       | 5.6        | 57        | 237     | 3.57 |
|                  | 9.3                | 13.3    | 12.9      | 5.6        | 2.3       | 48      | 105  |
|                  | 24.7               | 14.8    | 7.2       | 7.3        | 179       | 1.38    | 3.82 |
|                  | 3.9                | 5.6     | 8.7       | 7.7        | 72        | 237     | 2.08 |
|                  | 14.4               | 9.8     | 25.6      | 16.2       | 104       | 597     | 1.47 |
|                  | 19                 | 11.8    | 19.7      | 8.4        | 57        | 2.72    | 0.79 |
|                  | 10.7               | 14.5    | 7.7       | 5.6        | 57        | 237     | 3.57 |
|                  | 4.7                | 14.6    | 4.6       | 5.1        | 58        | 311     | 2.48 |
|                  | 9.7                | 26.4    | 3.8       | 4.4        | 69        | 280     | 2.02 |
|                  | 1.2                | 1.1     | 7.1       | 6          | 59        | 157     | 2.3  |
|                  | 2.7                | 18.2    | 4.1       | 5.5        | 69        | 237     | 2.64 |
|                  | 5                  | 17.9    | 3.9       | 3.5        | 57        | 237     | 1.71 |
|                  | 1.5                | 9.8     | 4.4       | 5.3        | 50        | 237     | 2.81 |
|                  | 10.7               | 14.5    | 7.7       | 5.6        | 57        | 237     | 3.57 |
|                  | 0.9                | 5.4     | 5.1       | 4.7        | 21        | 178     | 3.35 |
|                  | 0.9                | 5.2     | 3.6       | 3.4        | 20        | 174     | 3.22 |
|                  | 1.2                | 6       | 4.7       | 5.6        | 19        | 232     | 3.24 |
|                  | 4.3                | 8.3     | 7.7       | 5.6        | 57        | 237     | 2.2  |
|                  | 4.9                | 8.8     | 12.2      | 4.7        | 59        | 192     | 2.9  |

|      |       |       |      |       |     |      |
|------|-------|-------|------|-------|-----|------|
| 3.2  | 5     | 6.06  | 6.1  | 69    | 224 | 2.24 |
| 17.8 | 23.4  | 6.95  | 10.8 | 169   | 464 | 2.35 |
| 29.1 | 106.9 | 8.16  | 4.6  | 83    | 524 | 2.19 |
| 4.6  | 8.7   | 7.34  | 16   | 148   | 544 | 2.34 |
| 4.6  | 4.1   | 12.39 | 43.2 | 536   | 613 | 1.96 |
| 23.1 | 23    | 4.79  | 5.3  | 73    | 156 | 1.96 |
| 6.8  | 14    | 8.44  | 3.8  | 79    | 258 | 2.15 |
| 11.5 | 26.3  | 6.5   | 4.9  | 92    | 292 | 2.09 |
| 14.5 | 33.9  | 6.9   | 6.8  | 142   | 430 | 2.14 |
| 2.8  | 4.6   | 5.84  | 5.7  | 75    | 614 | 2.24 |
| 5.7  | 9.1   | 5.41  | 6.6  | 53    | 129 | 1.94 |
| 2.3  | 9.6   | 5.14  | 4.4  | 64    | 249 | 2.2  |
| 3.6  | 7     | 17.69 | 5.7  | 65    | 148 | 2.07 |
| 6.1  | 12.2  | 5.31  | 19.2 | 357   | 300 | 2.07 |
| 4.6  | 8.3   | 8.53  | 5.3  | 64    | 127 | 2.23 |
| 3.6  | 6.9   | 13.36 | 9.3  | 99    | 183 | 2.05 |
| 3.7  | 6.5   | 7.03  | 3    | 57    | 169 | 2.16 |
| 4.6  | 9.6   | 4.81  | 4.6  | 70    | 261 | 2.27 |
| 2.9  | 12.6  | 6.32  | 2.9  | 55    | 265 | 2.16 |
| 6.6  | 16.6  | 5.57  | 6    | 77    | 362 | 2.28 |
| 3.3  | 3.5   | 5.01  | 3.2  | 75    | 257 | 2.22 |
| 6.3  | 4.9   | 7.64  | 6.8  | 71    | 310 | 2.22 |
| 4.1  | 5.3   | 6.51  | 5.4  | 62    | 349 | 2.15 |
| 7.1  | 13.6  | 4.37  | 3.9  | 59    | 245 | 2.23 |
| 6.1  | 8     | 6.05  | 3.9  | 74    | 182 | 2.21 |
| 2.8  | 4.2   | 4.94  | 2.7  | 70    | 182 | 2.31 |
| 5.7  | 12.4  | 8.73  | 7.2  | 82    | 261 | 2.23 |
| 5.1  | 7.4   | 5.12  | 5.7  | 59    | 237 | 2.21 |
| 2.6  | 5.5   | 5.13  | 3.3  | 61    | 200 | 2.39 |
| 4.5  | 7.5   | 5.4   | 3.8  | 53    | 233 | 2.27 |
| 2.1  | 2.2   | 5     | 2.6  | 48    | 188 | 2.21 |
| 17.7 | 35.2  | 5.21  | 3.8  | 83    | 271 | 2.23 |
| 4.9  | 4.1   | 5.14  | 8.2  | 132   | 367 | 2.39 |
| 7.7  | 10.9  | 4.37  | 4    | 95    | 348 | 2.21 |
| 4.3  | 4     | 5.35  | 2.7  | 59    | 136 | 2.21 |
| 3.9  | 7.7   | 4.33  | 5.4  | 72    | 374 | 2.33 |
| 2.5  | 2.3   | 9.25  | 6.5  | 106   | 221 | 2.43 |
| 2.1  | 2.6   | 5.02  | 6.5  | 71    | 283 | 2.22 |
| 5    | 8.8   | 5.31  | 2.8  | 68    | 355 | 2.14 |
| 4.4  | 6.4   | 13.55 | 4.9  | 57    | 395 | 2.34 |
| 11.2 | 11.7  | 22.34 | 6.4  | 69.7  | 188 | 1.75 |
| 4.5  | 9.7   | 4.75  | 5.8  | 83    | 309 | 2.2  |
| 10   | 14    | 6.08  | 4.2  | 70.1  | 318 | 2.45 |
| 5.5  | 12.2  | 4.98  | 2.3  | 80.1  | 384 | 2.4  |
| 7.1  | 13.2  | 5.14  | 6.2  | 58.8  | 258 | 2.28 |
| 2.4  | 10.3  | 4.53  | 5.3  | 63.8  | 263 | 2.26 |
| 10.5 | 10.9  | 4.7   | 3.5  | 108.8 | 620 | 2.19 |
| 3.6  | 4.5   | 3.62  | 3    | 58    | 219 | 2.34 |
| 8.5  | 11    | 6.86  | 5.8  | 83    | 287 | 2.21 |
| 5    | 4.6   | 4.84  | 2.7  | 66.5  | 240 | 2.25 |
| 7.8  | 6.6   | 7.03  | 5.4  | 66.5  | 147 | 1.85 |

|      |      |       |      |       |     |      |
|------|------|-------|------|-------|-----|------|
| 5.6  | 11.6 | 5.62  | 2.6  | 46.5  | 190 | 2.42 |
| 3.7  | 4.2  | 5.02  | 4.3  | 70.5  | 274 | 2.07 |
| 8.5  | 11   | 6.86  | 5.8  | 83    | 287 | 2.21 |
| 4.5  | 0.3  | 4.5   | 4.1  | 47.7  | 281 | 2.43 |
| 2.9  | 2.9  | 3.94  | 6.3  | 39.6  | 172 | 2.18 |
| 5.5  | 10.9 | 4.67  | 6.6  | 104.3 | 661 | 2.41 |
| 5.1  | 7    | 4.99  | 3.7  | 81.4  | 364 | 2.38 |
| 2.9  | 5.5  | 12.89 | 5.4  | 68.2  | 322 | 2.19 |
| 1.2  | 7.1  | 4.76  | 6.6  | 57.1  | 243 | 2.2  |
| 5.8  | 5.5  | 6.35  | 2.3  | 45.3  | 125 | 2.14 |
| 8.8  | 11.5 | 5.85  | 5.3  | 49.3  | 228 | 2.26 |
| 6    | 6.2  | 5.01  | 5    | 47.5  | 164 | 2.2  |
| 6.6  | 9    | 4.47  | 3.4  | 79.2  | 392 | 2.41 |
| 10.6 | 11.8 | 5.68  | 3.2  | 48.1  | 140 | 2.2  |
| 6.2  | 10.4 | 6.19  | 4.66 | 68.7  | 299 | 2.39 |
| 8.5  | 11   | 6.86  | 5.8  | 83    | 287 | 2.21 |
| 5    | 6    | 9.06  | 3.5  | 65.8  | 391 | 2.18 |
| 5.8  | 8    | 13.55 | 4.4  | 108.6 | 411 | 2.06 |
| 8.5  | 11   | 6.86  | 5.8  | 83    | 287 | 2.21 |
| 7.6  | 11.4 | 7.92  | 6.2  | 55.3  | 170 | 2.05 |
| 7.1  | 4.8  | 4.07  | 4.3  | 51.5  | 121 | 1.86 |
| 5.3  | 7.8  | 5.61  | 6.2  | 81.4  | 360 | 2.18 |
| 8.5  | 11   | 6.86  | 5.8  | 83    | 287 | 2.21 |
| 4.8  | 7.8  | 16.36 | 8.3  | 77.4  | 254 | 2.3  |
| 7.7  | 12.4 | 4.68  | 4    | 98.6  | 338 | 2.19 |
| 6.4  | 9.8  | 4.05  | 4.6  | 45    | 191 | 2.17 |
| 2.5  | 1.3  | 7.53  | 28.7 | 401   | 572 | 2.36 |
| 1.9  | 1.6  | 5.97  | 10.3 | 211   | 256 | 2.26 |
| 2.8  | 1.1  | 9.19  | 10.7 | 76    | 470 | 2.32 |
| 3.8  | 11.9 | 6.69  | 8.9  | 67.1  | 292 | 2.52 |
| 3.6  | 3.8  | 4.39  | 6.5  | 69    | 291 | 2.26 |
| 5.9  | 9.4  | 4.47  | 8    | 93    | 319 | 2.3  |
| 8.3  | 33.1 | 4.67  | 10.4 | 70.1  | 452 | 2.42 |
| 2.8  | 1.8  | 5.11  | 4.5  | 62    | 219 | 2.16 |
| 4.8  | 6    | 4.9   | 6.1  | 76    | 292 | 2.44 |
| 2.5  | 5.5  | 4.28  | 8.3  | 99    | 314 | 2.46 |
| 1.4  | 2.8  | 5.16  | 5    | 70.5  | 238 | 2.32 |
| 2.4  | 7.4  | 5.02  | 4.7  | 66    | 239 | 2.36 |
| 3.7  | 10.2 | 6.03  | 2.7  | 58    | 148 | 2.22 |
| 3.5  | 13.1 | 5.62  | 8.4  | 61.7  | 140 | 2.02 |
| 1.6  | 5.4  | 4.66  | 5.2  | 73    | 252 | 2.16 |
| 3.5  | 4.4  | 5.39  | 4.7  | 80    | 274 | 2.22 |
| 4.4  | 8    | 4.19  | 4.1  | 61    | 140 | 2.05 |
| 3.5  | 15   | 4.46  | 6.6  | 97.6  | 554 | 2.35 |
| 8    | 15.5 | 6.59  | 4.3  | 56    | 112 | 1.91 |
| 3.5  | 8.2  | 5.1   | 4.7  | 78    | 436 | 2.4  |
| 9.5  | 29   | 5.2   | 3.7  | 93    | 513 | 2.17 |
| 5    | 12.9 | 5.2   | 3.7  | 77    | 240 | 3.22 |
| 8.1  | 22.6 | 4.5   | 2.7  | 86    | 250 | 2.82 |
| 5.3  | 17.5 | 4.5   | 2.9  | 77    | 298 | 2.66 |
| 9.5  | 21   | 4.7   | 1.9  | 58    | 269 | 2.52 |

|      |      |       |     |      |     |      |
|------|------|-------|-----|------|-----|------|
| 9.8  | 20.5 | 4.1   | 1.8 | 50   | 237 | 0.27 |
| 6.8  | 13.9 | 4.1   | 1.4 | 45   | 199 | 2.72 |
| 4.9  | 6.4  | 5.1   | 1.9 | 70   | 133 | 1.55 |
| 10.7 | 14.5 | 7.7   | 5.6 | 57   | 237 | 3.57 |
| 4.6  | 8.3  | 6.3   | 3.9 | 58   | 213 | 1.97 |
| 2.8  | 7.9  | 5.1   | 3.8 | 58   | 161 | 2.39 |
| 4.1  | 7.6  | 7.2   | 3.2 | 41   | 121 | 0.7  |
| 7.5  | 20.8 | 11.2  | 4.3 | 50   | 138 | 2.75 |
| 3.1  | 9    | 5.2   | 3   | 32   | 237 | 2.49 |
| 8.5  | 11   | 6.86  | 5.8 | 83   | 287 | 2.21 |
| 92   | 30.3 | 8.84  | 5.4 | 68   | 308 | 2.31 |
| 4.3  | 5.4  | 4.8   | 5.7 | 70.1 | 317 | 2.14 |
| 4.8  | 8.5  | 6.15  | 7.4 | 69   | 315 | 2.09 |
| 96.7 | 22.8 | 5.33  | 2.3 | 46.7 | 237 | 2.27 |
| 6.4  | 7.3  | 5.96  | 6.5 | 73.7 | 209 | 2.29 |
| 5.7  | 6.3  | 10.64 | 4.1 | 60.5 | 224 | 2.17 |
| 6.6  | 7.7  | 10.03 | 5.6 | 86.8 | 203 | 2    |
| 5.3  | 4.6  | 4.77  | 3.8 | 105  | 484 | 2.14 |
| 5.6  | 4.9  | 4.48  | 6.3 | 102  | 266 | 2.25 |
| 2.4  | 2.2  | 4.87  | 5.8 | 70   | 244 | 2.26 |
| 1.3  | 0.8  | 4.53  | 4.7 | 64   | 720 | 2.23 |
| 3.4  | 4.1  | 4.51  | 5.2 | 71   | 239 | 2.04 |
| 3.9  | 3.1  | 4.89  | 5.6 | 73   | 277 | 2.13 |
| 3.2  | 4    | 4.9   | 4.5 | 55   | 269 | 2.45 |
| 4.9  | 7.4  | 4.95  | 6.2 | 89   | 261 | 2.47 |
| 4.4  | 5.7  | 4.97  | 5.7 | 58.8 | 312 | 2.18 |
| 5.3  | 10.7 | 5.03  | 4.5 | 92   | 408 | 2.15 |

| Phosphorus | Creatine kinase | Lactate dehydrogenase | Creatine kinase isoenzymes |      |
|------------|-----------------|-----------------------|----------------------------|------|
| 0.44       |                 | 50                    | 222                        | 12   |
| 4.77       |                 | 92                    | 312                        | 16   |
| 0.7        |                 | 28                    | 242                        | 9    |
| 0.72       |                 | 28                    | 209                        | 13   |
| 4.77       |                 | 92                    | 312                        | 16   |
| 0.95       |                 | 327                   | 483                        | 27   |
| 4.77       |                 | 92                    | 312                        | 16   |
| 1.24       |                 | 45                    | 260                        | 9    |
| 0.75       |                 | 35                    | 263                        | 10   |
| 1.15       |                 | 40                    | 312                        | 13   |
| 1.22       |                 | 212                   | 320                        | 10   |
| 1.06       |                 | 188                   | 255                        | 13   |
| 0.92       |                 | 199                   | 312                        | 21   |
| 1.47       |                 | 347                   | 312                        | 45   |
| 1.1        |                 | 643                   | 316                        | 34   |
| 0.75       |                 | 68                    | 312                        | 13   |
| 0.59       |                 | 69                    | 170                        | 9    |
| 0.65       |                 | 92                    | 312                        | 16   |
| 4.77       |                 | 92                    | 312                        | 16   |
| 4.77       |                 | 92                    | 312                        | 16   |
| 0.88       |                 | 113                   | 754                        | 17   |
| 4.77       |                 | 92                    | 312                        | 16   |
| 4.77       |                 | 92                    | 312                        | 16   |
| 4.77       |                 | 92                    | 312                        | 16   |
| 0.8        |                 | 59                    | 239                        | 17   |
| 4.77       |                 | 92                    | 312                        | 16   |
| 0.92       |                 | 112                   | 466                        | 16   |
| 0.69       |                 | 159                   | 602                        | 18   |
| 0.75       |                 | 97                    | 486                        | 18   |
| 0.84       |                 | 56                    | 567                        | 15   |
| 1.17       |                 | 150                   | 3293                       | 69   |
| 4.77       |                 | 92                    | 312                        | 16   |
| 2.31       | 0.54            |                       | 272                        | 31   |
| 218        | 65              |                       | 259                        | 3.95 |
| 1.09       | 72              |                       | 261                        | 16   |
| 1.17       | 255             |                       | 301                        | 34   |
| 52         | 376             |                       | 20                         | 3.72 |
| 4.77       | 92              |                       | 312                        | 16   |
| 1.14       | 92              |                       | 312                        | 16   |
| 0.86       | 54              |                       | 312                        | 14   |
| 1.12       | 21              |                       | 312                        | 11   |
| 1.16       | 51              |                       | 173                        | 10   |
| 1.1        | 33              |                       | 128                        | 10   |
| 1.22       | 41              |                       | 147                        | 11   |
| 4.77       | 92              |                       | 312                        | 16   |
| 1.62       | 105             |                       | 312                        | 35   |
| 2.16       | 93              |                       | 312                        | 48   |
| 1.82       | 99              |                       | 325                        | 35   |
| 0.98       | 93              |                       | 266                        | 16   |
| 0.77       | 61              |                       | 312                        | 18   |

|      |       |     |      |
|------|-------|-----|------|
| 0.96 | 101   | 243 | 14.4 |
| 1.51 | 135   | 340 | 21.2 |
| 1.05 | 60    | 677 | 13.9 |
| 1.03 | 49    | 170 | 8.9  |
| 1.66 | 100   | 21  | 10.4 |
| 0.83 | 251   | 246 | 23.7 |
| 0.87 | 36    | 248 | 8.1  |
| 0.59 | 172   | 187 | 13.6 |
| 0.81 | 131   | 181 | 13.8 |
| 1.19 | 402   | 232 | 13.4 |
| 0.81 | 98    | 182 | 10.1 |
| 1.16 | 51    | 283 | 32.5 |
| 0.67 | 43    | 32  | 21.4 |
| 0.96 | 24    | 316 | 8.8  |
| 1.19 | 77    | 149 | 11.7 |
| 0.8  | 51    | 152 | 8.2  |
| 0.99 | 63    | 172 | 8.9  |
| 0.74 | 75    | 182 | 13.7 |
| 1.19 | 44    | 248 | 26.4 |
| 1.04 | 135   | 222 | 12.3 |
| 0.84 | 79    | 170 | 9    |
| 1.02 | 112   | 257 | 15   |
| 1.12 | 58    | 205 | 9    |
| 1.6  | 55    | 271 | 10   |
| 1.02 | 61    | 335 | 6    |
| 1.32 | 52    | 236 | 15   |
| 1.38 | 171   | 266 | 15   |
| 1.02 | 161   | 166 | 13   |
| 1.31 | 57    | 169 | 11   |
| 1.15 | 68    | 234 | 11   |
| 1.02 | 117   | 206 | 2.5  |
| 0.9  | 61    | 216 | 11   |
| 1.17 | 128   | 146 | 12   |
| 1.02 | 77    | 157 | 10   |
| 1.02 | 46    | 194 | 2.8  |
| 1.04 | 76    | 182 | 13   |
| 0.85 | 63    | 272 | 18   |
| 0.91 | 20    | 166 | 12   |
| 1.26 | 143   | 278 | 10   |
| 1.12 | 102   | 245 | 10   |
| 0.81 | 31.7  | 286 | 3.5  |
| 0.85 | 68.5  | 164 | 10   |
| 1.21 | 45.7  | 175 | 5.4  |
| 1.2  | 284.4 | 248 | 13.8 |
| 1.17 | 84.4  | 185 | 11.6 |
| 1.33 | 58.3  | 214 | 22.6 |
| 1.01 | 240.4 | 253 | 9.4  |
| 1.38 | 111.8 | 278 | 19.6 |
| 1.02 | 104.8 | 216 | 11.2 |
| 1.23 | 104.8 | 216 | 11.2 |
| 0.7  | 104.5 | 301 | 6.6  |

|      |       |     |      |
|------|-------|-----|------|
| 0.84 | 45.7  | 242 | 9.9  |
| 1.11 | 84.2  | 288 | 11.6 |
| 1.02 | 104.8 | 216 | 11.2 |
| 1.34 | 72.6  | 189 | 12.5 |
| 0.65 | 99.8  | 175 | 8.2  |
| 0.88 | 179.1 | 181 | 9.8  |
| 1.26 | 930.1 | 190 | 17.7 |
| 1.25 | 58.6  | 177 | 10   |
| 1.41 | 50    | 166 | 15.2 |
| 0.88 | 214.7 | 227 | 8.2  |
| 1.01 | 54.2  | 267 | 8.3  |
| 0.79 | 47.7  | 146 | 7.9  |
| 1.04 | 120.5 | 204 | 13.5 |
| 0.79 | 70.8  | 181 | 7.3  |
| 1.11 | 157.9 | 332 | 13   |
| 1.02 | 104.8 | 216 | 11.2 |
| 0.96 | 61.4  | 157 | 7.6  |
| 1.02 | 106.8 | 164 | 6.2  |
| 1.02 | 104.8 | 216 | 11.2 |
| 0.54 | 81.7  | 171 | 7.3  |
| 0.85 | 36.1  | 190 | 4.7  |
| 0.84 | 34.4  | 183 | 5    |
| 1.02 | 104.8 | 216 | 11.2 |
| 1.06 | 59.2  | 160 | 9.2  |
| 0.43 | 110.6 | 177 | 2.3  |
| 1.12 | 30    | 266 | 23   |
| 1.65 | 17    | 143 | 8    |
| 1.28 | 125   | 234 | 26   |
| 1.01 | 17    | 158 | 15   |
| 0.75 | 126   | 130 | 12   |
| 1.19 | 40    | 193 | 16   |
| 1.2  | 38    | 214 | 24   |
| 0.3  | 47    | 200 | 15   |
| 0.89 | 41    | 187 | 4    |
| 1.07 | 95    | 161 | 10   |
| 0.83 | 51    | 162 | 18   |
| 1    | 44    | 176 | 12   |
| 0.77 | 42    | 165 | 10   |
| 0.88 | 71    | 164 | 20   |
| 0.83 | 20    | 165 | 11   |
| 0.87 | 26    | 145 | 8    |
| 0.94 | 26    | 207 | 14   |
| 0.8  | 23    | 221 | 5    |
| 0.8  | 74    | 201 | 13   |
| 0.84 | 29    | 183 | 6    |
| 1.28 | 63    | 312 | 12   |
| 1.52 | 53    | 205 | 11   |
| 1.13 | 52    | 312 | 14   |
| 0.98 | 51    | 312 | 9    |
| 1.04 | 61    | 185 | 16   |
| 0.78 | 49    | 312 | 15   |

|      |       |     |      |
|------|-------|-----|------|
| 0.76 | 45    | 191 | 11   |
| 0.66 | 39    | 187 | 14   |
| 1.34 | 273   | 312 | 15   |
| 4.77 | 92    | 312 | 16   |
| 1.12 | 46    | 151 | 13   |
| 1.2  | 56    | 184 | 13   |
| 1.24 | 52    | 168 | 15   |
| 1.09 | 98    | 312 | 19   |
| 0.92 | 51    | 209 | 15   |
| 1.02 | 104.8 | 216 | 11.2 |
| 0.43 | 47.9  | 233 | 6.9  |
| 0.93 | 88.9  | 202 | 12.9 |
| 0.98 | 77.4  | 138 | 5.4  |
| 0.87 | 119.8 | 405 | 7.2  |
| 1.26 | 56.3  | 160 | 8.1  |
| 1.15 | 105.3 | 171 | 6    |
| 0.82 | 62.6  | 196 | 5.7  |
| 0.81 | 22    | 228 | 7    |
| 0.84 | 48    | 195 | 17   |
| 1.24 | 47    | 179 | 9    |
| 1.47 | 39    | 122 | 17   |
| 1.01 | 63    | 191 | 16   |
| 0.84 | 47    | 184 | 13   |
| 0.75 | 26    | 138 | 10   |
| 0.79 | 25    | 142 | 13   |
| 1.06 | 72    | 138 | 20   |
| 0.83 | 34    | 203 | 12   |



| Kalium | Sodium | Chlorine | Magnesium | C-reactive protein | ALB/GLB     |
|--------|--------|----------|-----------|--------------------|-------------|
| 2.38   | 128.2  | 106.3    | 1         |                    | 15.91 1.67  |
| 9.08   | 136.9  | 103.7    | 1         |                    | 28.37 1.54  |
| 2.49   | 134.3  | 91.1     | 1         |                    | 4.84 1.62   |
| 4.39   | 141.1  | 106.5    | 0.9       |                    | 3.41 1.76   |
| 3.49   | 135    | 101.7    | 1         |                    | 28.37 1.43  |
| 4.01   | 140.5  | 99.7     | 1         |                    | 85.87 1.25  |
| 9.08   | 136.9  | 103.7    | 1         |                    | 2.28 0.94   |
| 4.34   | 133.4  | 102      | 1         |                    | 5.78 1.31   |
| 4.68   | 141.4  | 105.2    | 0.9       |                    | 38.55 1.23  |
| 3.45   | 145.6  | 106.2    | 0.7       |                    | 5.05 1.55   |
| 4.59   | 141.5  | 105.8    | 1         |                    | 38.67 1.27  |
| 5.09   | 143.8  | 109.4    | 1         |                    | 12.74 1.33  |
| 4.48   | 144    | 104.5    | 0.8       |                    | 3.12 0.75   |
| 5      | 143.9  | 107      | 1.2       |                    | 3.56 1.2    |
| 4.73   | 144.2  | 108.6    | 1         |                    | 37.85 1.63  |
| 4.63   | 135.9  | 105.6    | 0.7       |                    | 3.43 1.44   |
| 4.08   | 136    | 109.7    | 0.7       |                    | 1.72 1.5    |
| 3.74   | 138.3  | 107      | 0.8       |                    | 28.37 1.61  |
| 9.08   | 136.9  | 103.7    | 1         |                    | 28.37 1.54  |
| 9.08   | 136.9  | 103.7    | 1         |                    | 28.37 1.54  |
| 4.87   | 136.4  | 102.2    | 1         |                    | 12.49 0.83  |
| 9.08   | 136.9  | 103.7    | 1         |                    | 28.37 1.54  |
| 9.08   | 136.9  | 103.7    | 1         |                    | 28.37 1.54  |
| 9.08   | 136.9  | 103.7    | 1         |                    | 28.37 1.54  |
| 4.7    | 137.8  | 109.9    | 0.7       |                    | 154.75 1.5  |
| 9.08   | 136.9  | 103.7    | 1         |                    | 28.37 1.54  |
| 3.9    | 137.2  | 109.1    | 1         |                    | 168.06 1.87 |
| 3.92   | 140.3  | 108.7    | 1         |                    | 168.99 2    |
| 3.3    | 132.3  | 103.4    | 0.6       |                    | 157.73 1.68 |
| 4.12   | 134.5  | 99.8     | 0.6       |                    | 160.88 1.5  |
| 4.06   | 139.1  | 97.2     | 1         |                    | 136.97 2.07 |
| 9.08   | 136.9  | 103.7    | 1         |                    | 28.37 1.54  |
| 3.93   | 125.3  | 93.4     | 0.6       |                    | 114.86 1.4  |
| 139.7  | 95.5   | 103.7    | 1         |                    | 56.3 0.56   |
| 4.23   | 133.3  | 98.8     | 1         |                    | 73.84 1.58  |
| 4.55   | 122.3  | 111.9    | 1         |                    | 50.11 1.14  |
| 140.3  | 102.5  | 103.7    | 1         |                    | 122.5 1.14  |
| 9.08   | 136.9  | 103.7    | 1         |                    | 28.37 1.54  |
| 4.32   | 140.1  | 103.7    | 0.6       |                    | 0.89 1.67   |
| 3.8    | 140.1  | 103.8    | 1         |                    | 5.03 1.6    |
| 4.64   | 139.7  | 104      | 1.3       |                    | 2.18 1.81   |
| 4.86   | 133.2  | 99.2     | 1         |                    | 0.15 1.95   |
| 4.19   | 137.8  | 101      | 1         |                    | 1.33 1.81   |
| 5.09   | 139.7  | 108.8    | 1         |                    | 1.33 1.86   |
| 9.08   | 136.9  | 103.7    | 1         |                    | 28.37 1.54  |
| 5.33   | 143.7  | 108.7    | 1         |                    | 0.83 1.81   |
| 4.98   | 146.4  | 111.9    | 1.2       |                    | 0.95 1.88   |
| 4.75   | 140.4  | 104.4    | 0.9       |                    | 0.84 2.14   |
| 3.81   | 135.2  | 98.2     | 0.6       |                    | 28.42 1.58  |
| 3.95   | 137.7  | 101.9    | 0.9       |                    | 26.56 1.31  |

|      |       |       |      |        |      |
|------|-------|-------|------|--------|------|
| 4.26 | 137   | 96    | 0.75 | 53     | 1.6  |
| 4.81 | 134   | 88    | 0.9  | 53     | 1.1  |
| 4.7  | 137   | 90    | 0.74 | 53     | 1.6  |
| 4.49 | 147   | 102   | 0.88 | 53     | 2.5  |
| 4.12 | 133   | 89    | 0.89 | 53     | 0.9  |
| 4.06 | 137   | 93    | 0.87 | 53     | 1    |
| 3.38 | 140   | 95    | 0.77 | 53     | 1.8  |
| 3.54 | 130   | 89    | 0.59 | 53     | 1.3  |
| 3.63 | 138   | 97    | 0.8  | 53     | 1.1  |
| 3.59 | 138   | 97    | 0.81 | 53     | 1.8  |
| 3.44 | 143   | 100   | 0.84 | 53     | 1    |
| 5.13 | 141   | 101   | 0.9  | 53     | 1.5  |
| 3.51 | 146   | 105   | 0.74 | 53     | 0.9  |
| 3.39 | 139   | 101   | 0.79 | 53     | 1.3  |
| 4.92 | 130   | 92    | 0.81 | 53     | 1.2  |
| 4.42 | 135   | 97    | 0.83 | 53     | 0.7  |
| 4.21 | 138   | 99    | 0.91 | 53     | 1.3  |
| 3.78 | 142   | 103   | 0.91 | 53     | 1.3  |
| 4.31 | 147   | 103   | 0.85 | 53     | 1.3  |
| 3.92 | 145   | 106   | 0.9  | 53     | 1.5  |
| 4.6  | 138.4 | 102.9 | 0.95 | 17.81  | 1.2  |
| 4.36 | 134.3 | 100.3 | 0.76 | 20.74  | 1.7  |
| 3.21 | 139.3 | 108.9 | 0.77 | 46.6   | 1    |
| 4.01 | 143.1 | 110.6 | 0.77 | 4      | 2    |
| 4.41 | 132.7 | 93.4  | 0.86 | 186.45 | 1.6  |
| 4.04 | 141.6 | 103.7 | 0.95 | 0.78   | 1.8  |
| 3.83 | 142.5 | 103.8 | 0.8  | 4      | 1.7  |
| 4.07 | 138.1 | 102.6 | 0.86 | 110.75 | 1.7  |
| 4.01 | 140.4 | 103   | 0.9  | 5.94   | 2    |
| 3.71 | 138.6 | 103.4 | 0.85 | 11.73  | 1.6  |
| 4.31 | 137.6 | 102.6 | 0.86 | 19.22  | 1.2  |
| 3.5  | 141.3 | 101.5 | 0.85 | 96.2   | 1.7  |
| 5.24 | 143.1 | 105.5 | 0.98 | 53     | 1.6  |
| 3.55 | 137   | 100.8 | 0.86 | 28.97  | 1.4  |
| 4.37 | 138.2 | 105.4 | 0.86 | 158.23 | 1.1  |
| 4    | 143.2 | 101.9 | 0.86 | 4      | 1.7  |
| 4.59 | 135   | 97.6  | 1.03 | 2.74   | 1.4  |
| 3.94 | 142.7 | 107.6 | 0.83 | 4      | 1.6  |
| 4.28 | 138   | 95.8  | 1.01 | 62.08  | 1.4  |
| 4.12 | 140   | 101.3 | 0.76 | 6.57   | 1.9  |
| 4.1  | 130.4 | 101.4 | 0.77 | 53     | 1.36 |
| 3.9  | 141.5 | 110   | 0.91 | 1.7    | 1.74 |
| 3.6  | 139.6 | 100.1 | 0.78 | 15.5   | 1.46 |
| 3.6  | 138.6 | 99.2  | 0.9  | 66.7   | 1.59 |
| 4.3  | 143.7 | 110.3 | 0.92 | 53     | 2.1  |
| 3.8  | 141.5 | 111.7 | 0.94 | 5.9    | 1.67 |
| 3.5  | 135.3 | 100   | 1.01 | 81.8   | 1.95 |
| 3.8  | 139.2 | 104.3 | 1.13 | 24.6   | 1.53 |
| 4    | 143.2 | 101.9 | 0.86 | 53     | 1.48 |
| 3.9  | 139.5 | 105.9 | 1    | 53     | 1.17 |
| 3.8  | 127.6 | 99    | 1.01 | 124.6  | 1.37 |

|      |       |       |      |       |      |
|------|-------|-------|------|-------|------|
| 3.9  | 138.3 | 104.4 | 0.98 | 35.1  | 1.5  |
| 4    | 139.7 | 104.9 | 0.89 | 15.3  | 2.54 |
| 4    | 143.2 | 101.9 | 0.86 | 53    | 1.48 |
| 4.1  | 140.4 | 105.5 | 0.97 | 22.4  | 1.45 |
| 4    | 141.2 | 110   | 0.78 | 0.2   | 1.56 |
| 3.7  | 143.5 | 109.7 | 0.91 | 11.3  | 1.52 |
| 4.6  | 143.2 | 109.5 | 0.79 | 2.5   | 2.09 |
| 4    | 134.4 | 105.3 | 0.63 | 0.3   | 2.03 |
| 3.8  | 142   | 110.8 | 0.99 | 3.7   | 2.04 |
| 3.4  | 139   | 103.2 | 1.22 | 82.9  | 1.32 |
| 3.7  | 137.4 | 103.1 | 0.89 | 10.3  | 1.42 |
| 3.1  | 141.9 | 105.5 | 0.94 | 237.1 | 0.91 |
| 3.7  | 140.8 | 107.3 | 0.95 | 1.4   | 1.35 |
| 4.1  | 131.4 | 91.8  | 0.79 | 249.2 | 1.14 |
| 3.8  | 135.9 | 100.4 | 0.81 | 128.7 | 1.22 |
| 4    | 143.2 | 101.9 | 0.86 | 53    | 1.48 |
| 3.5  | 135.9 | 105.9 | 0.82 | 4.1   | 1.4  |
| 4    | 127.2 | 98.9  | 0.9  | 24    | 1.39 |
| 4    | 143.2 | 101.9 | 0.86 | 53    | 1.48 |
| 3.5  | 139.4 | 109.4 | 0.85 | 60.9  | 1.4  |
| 3.1  | 130.1 | 93.9  | 0.61 | 182.8 | 0.89 |
| 4.2  | 129   | 99.3  | 0.94 | 77.9  | 1.43 |
| 4    | 143.2 | 101.9 | 0.86 | 53    | 1.48 |
| 4.3  | 131.9 | 102   | 0.84 | 17.3  | 1.64 |
| 3.4  | 135.5 | 100   | 0.71 | 22.3  | 1.42 |
| 4.43 | 136   | 99    | 0.96 | 2.56  | 1.12 |
| 4.97 | 135   | 97    | 0.99 | 7.71  | 0.95 |
| 4.32 | 143   | 104   | 0.94 | 6.64  | 1.6  |
| 4.12 | 138   | 101   | 0.99 | 5.07  | 1.16 |
| 3.45 | 144.3 | 110.8 | 0.93 | 7     | 1.12 |
| 4.01 | 142   | 105.7 | 0.81 | 7.54  | 1.98 |
| 4.32 | 142.6 | 102.2 | 0.98 | 2.32  | 1.52 |
| 3.57 | 142.4 | 106.4 | 0.87 | 2.02  | 0.85 |
| 4.01 | 137   | 99    | 0.98 | 3.39  | 1.1  |
| 3.83 | 136   | 99.4  | 0.81 | 7.36  | 1.46 |
| 4.28 | 140.3 | 105.4 | 0.89 | 7.99  | 1.65 |
| 4.03 | 140.9 | 102.8 | 1.29 | 7.24  | 1.47 |
| 3.5  | 141.9 | 108   | 1.13 | 2.31  | 1.51 |
| 4.47 | 121.7 | 86.9  | 1.49 | 6.3   | 2.44 |
| 3.58 | 125.9 | 91    | 0.9  | 5.5   | 1.38 |
| 4.04 | 142.6 | 105.1 | 1.73 | 4     | 1.2  |
| 4.3  | 140.7 | 104.1 | 1.17 | 4.82  | 1.31 |
| 3.9  | 135.5 | 98.1  | 1.13 | 5.83  | 0.85 |
| 5.34 | 143.2 | 107.2 | 1.26 | 6.03  | 1.39 |
| 3.72 | 131.5 | 95.4  | 1.11 | 7.75  | 1.06 |
| 4.64 | 139   | 103   | 0.5  | 2.24  | 1.78 |
| 4.51 | 136.7 | 105.9 | 0.6  | 2.66  | 1.92 |
| 4.68 | 139.2 | 103.6 | 0.7  | 2.59  | 1.79 |
| 4.39 | 139.8 | 105   | 0.8  | 1.46  | 1.95 |
| 4.63 | 137.8 | 99.9  | 0.9  | 0.91  | 1.78 |
| 4.51 | 138   | 107   | 1    | 3.65  | 1.13 |

|      |       |       |      |       |      |
|------|-------|-------|------|-------|------|
| 4.11 | 138.3 | 106.7 | 0.9  | 1.82  | 1.24 |
| 4.35 | 148.6 | 96.1  | 0.4  | 9.79  | 1.1  |
| 4.68 | 136.5 | 102   | 0.6  | 48.97 | 1.54 |
| 9.08 | 136.9 | 103.7 | 1    | 28.37 | 1.54 |
| 3.86 | 140.7 | 104.7 | 0.5  | 1.49  | 1.72 |
| 3.73 | 141   | 104.1 | 0.6  | 28.37 | 1.54 |
| 4.08 | 129   | 115.7 | 1    | 1.43  | 1.64 |
| 2.99 | 135   | 92.3  | 0.8  | 1.72  | 1.75 |
| 4.2  | 139   | 104   | 1    | 1.84  | 1.78 |
| 4    | 143.2 | 101.9 | 0.86 | 53    | 1.48 |
| 3.5  | 140.6 | 108.9 | 0.67 | 78.6  | 2    |
| 3.8  | 136.3 | 104.7 | 0.79 | 29.3  | 1.3  |
| 3.8  | 532.6 | 101.6 | 0.85 | 57.6  | 1.55 |
| 3.4  | 136.6 | 99.9  | 0.96 | 135.1 | 1.18 |
| 4    | 138.6 | 105.4 | 0.9  | 127.5 | 1.35 |
| 3.8  | 137.9 | 106.2 | 0.85 | 70    | 1.42 |
| 4    | 136.4 | 102.9 | 0.67 | 62.7  | 1.18 |
| 3.74 | 135.4 | 99.8  | 0.63 | 7     | 1.41 |
| 4.01 | 140.9 | 105.1 | 0.86 | 7.36  | 1.37 |
| 4    | 133   | 96    | 0.89 | 4.19  | 1.29 |
| 3.83 | 138   | 100   | 0.87 | 2.83  | 1.38 |
| 4.21 | 137   | 101   | 1.08 | 7.79  | 0.79 |
| 3.63 | 138.5 | 100.9 | 0.9  | 7.39  | 1.24 |
| 4.14 | 143.3 | 108   | 1.54 | 6.41  | 1.28 |
| 3.84 | 144.3 | 108.1 | 1.52 | 6.81  | 1.43 |
| 3.31 | 140.6 | 105   | 1.32 | 4.91  | 1.06 |
| 4.06 | 137.7 | 104.3 | 1.08 | 7.88  | 1.37 |

| Direct bilirubin/Total bilirubin | AST/ALT | White blood cell | Lymphocytes | Lymphocytes | Lymphocytes |
|----------------------------------|---------|------------------|-------------|-------------|-------------|
| 0.47                             | 2.11    |                  | 2.3         | 0.4         | 0           |
| 0.35                             | 1.12    |                  | 5.9         | 0.4         | 0           |
| 0.44                             | 1       |                  | 4.3         | 0.2         | 0.1         |
| 0.31                             | 2       |                  | 2.2         | 0.5         | 0.2         |
| 0.3                              | 0.81    |                  | 6.4         | 0.8         | 0.5         |
| 0.39                             | 0.7     |                  | 10.7        | 0.6         | 0.2         |
| 0.35                             | 0.32    |                  | 7.6         | 1.2         | 0.4         |
| 0.3                              | 0.23    |                  | 5.1         | 1.1         | 0.6         |
| 0.46                             | 0.62    |                  | 10.7        | 1.4         | 0.7         |
| 0.43                             | 0.38    |                  | 10.4        | 0.4         | 0.2         |
| 0.38                             | 1.11    |                  | 11.5        | 1.3         | 0.7         |
| 0.5                              | 0.81    |                  | 8.3         | 0.6         | 0.4         |
| 0.41                             | 0.75    |                  | 18.3        | 0.8         | 0.9         |
| 0.35                             | 0.67    |                  | 11.6        | 0.9         | 0.5         |
| 0.4                              | 0.74    |                  | 5.8         | 0.6         | 0.3         |
| 0.31                             | 1.73    |                  | 4.2         | 1.1         | 0.5         |
| 0.29                             | 1.64    |                  | 4           | 1.2         | 0.4         |
| 0.31                             | 1.13    |                  | 4.2         | 1           | 0.3         |
| 0.35                             | 1.12    |                  | 9.5         | 0.4         | 0.3         |
| 0.35                             | 1.12    |                  | 7.7         | 0.3         | 0.3         |
| 0.49                             | 0.41    |                  | 8.4         | 0.2         | 0.3         |
| 0.35                             | 1.12    |                  | 9           | 0.1         | 0.2         |
| 0.35                             | 1.12    |                  | 18.1        | 0.2         | 0.2         |
| 0.35                             | 1.12    |                  | 14.8        | 0.2         | 0.2         |
| 0.45                             | 0.5     |                  | 10.6        | 0.2         | 0.2         |
| 0.35                             | 1.12    |                  | 10.6        | 0.5         | 0.3         |
| 0.64                             | 0.72    |                  | 11.4        | 0.1         | 0           |
| 0.67                             | 0.6     |                  | 8           | 0.4         | 0.2         |
| 0.6                              | 0.51    |                  | 11.7        | 0.7         | 0.3         |
| 0.64                             | 0.74    |                  | 13          | 0.8         | 0.3         |
| 0.66                             | 1.72    |                  | 54.1        | 8.7         | 2.7         |
| 0.35                             | 1.12    |                  | 13          | 1.2         | 0.6         |
| 0.41                             | 0.65    |                  | 7.6         | 0.3         | 0.4         |
| 0.63                             | 0       |                  | 28.2        | 0.5         | 0.6         |
| 0.41                             | 1.14    |                  | 4.8         | 0.9         | 0.6         |
| 0.6                              | 1.13    |                  | 8.6         | 0.3         | 0.3         |
| 0.62                             | 0.68    |                  | 7.4         | 1.1         | 0.4         |
| 0.35                             | 1.12    |                  | 11          | 0.4         | 0.3         |
| 0.24                             | 2       |                  | 3.9         | 1.9         | 0.4         |
| 0.27                             | 2.07    |                  | 4.1         | 1.3         | 0.4         |
| 0.52                             | 4.33    |                  | 8.4         | 1.9         | 0.5         |
| 0.13                             | 3       |                  | 5.8         | 1.7         | 0.3         |
| 0.22                             | 1.7     |                  | 6           | 1.7         | 0.5         |
| 0.13                             | 2.43    |                  | 7.4         | 1.1         | 0.4         |
| 0.35                             | 1.12    |                  | 6.1         | 3.7         | 0.8         |
| 0.14                             | 4.4     |                  | 8.9         | 7.1         | 0.5         |
| 0.15                             | 5.22    |                  | 7.4         | 1.1         | 0.4         |
| 0.17                             | 4.4     |                  | 8.1         | 5.6         | 0.5         |
| 0.34                             | 0.72    |                  | 2.4         | 0.8         | 0.3         |
| 0.36                             | 0.45    |                  | 8.3         | 0.6         | 0.3         |

|      |      |       |      |      |
|------|------|-------|------|------|
| 0.39 | 0.3  | 7     | 1.28 | 1.26 |
| 0.43 | 0.7  | 5.69  | 1.2  | 0.43 |
| 0.21 | 0.4  | 5.75  | 0.8  | 0.24 |
| 0.35 | 0.6  | 4.86  | 0.5  | 0.29 |
| 0.53 | 1.4  | 6.51  | 0.8  | 1.17 |
| 0.5  | 0.9  | 11.18 | 1.1  | 0.67 |
| 0.33 | 0.9  | 12.69 | 0.7  | 0.23 |
| 0.3  | 1.1  | 13.5  | 0.4  | 0.92 |
| 0.3  | 0.6  | 3.58  | 0.8  | 0.21 |
| 0.38 | 0.5  | 4.67  | 0.9  | 0.37 |
| 0.39 | 0.7  | 5.47  | 1    | 0.59 |
| 0.19 | 0.4  | 4.16  | 0.8  | 0.28 |
| 0.34 | 1.7  | 7.58  | 1.4  | 0.21 |
| 0.33 | 0.2  | 4.52  | 0.9  | 0.2  |
| 0.36 | 0.5  | 11.94 | 1.4  | 0.98 |
| 0.34 | 0.6  | 6.63  | 0.6  | 0.32 |
| 0.36 | 1.4  | 11.16 | 1.5  | 0.69 |
| 0.32 | 0.7  | 8.89  | 2.8  | 0.88 |
| 0.19 | 0.8  | 3.88  | 0.8  | 0.42 |
| 0.28 | 0.8  | 4.89  | 1.8  | 0.29 |
| 0.49 | 1.1  | 8     | 1.3  | 0.4  |
| 0.56 | 1.4  | 4.8   | 0.4  | 0.7  |
| 0.44 | 3.7  | 3.6   | 1.2  | 0.3  |
| 0.34 | 2.3  | 3.6   | 1.1  | 0.2  |
| 0.43 | 1.5  | 10.3  | 0.7  | 0.1  |
| 0.4  | 1.3  | 9.2   | 0.8  | 0.1  |
| 0.31 | 0.7  | 9.4   | 1.9  | 0.7  |
| 0.41 | 1    | 12    | 2.8  | 0.4  |
| 0.32 | 1.1  | 5.5   | 1.8  | 0.4  |
| 0.38 | 1.5  | 4.2   | 1.1  | 0.2  |
| 0.49 | 0.6  | 6.6   | 1.8  | 0.5  |
| 0.33 | 1.6  | 4     | 0.5  | 0.3  |
| 0.54 | 1.3  | 8.6   | 1.7  | 0.6  |
| 0.41 | 2    | 6.3   | 2.5  | 0.7  |
| 0.52 | 0.8  | 6.2   | 1.4  | 0.5  |
| 0.34 | 1.1  | 6.7   | 1.5  | 0.6  |
| 0.52 | 1.3  | 6.2   | 1.4  | 0.3  |
| 0.45 | 1.3  | 5.3   | 2.3  | 0.3  |
| 0.36 | 0.8  | 9.3   | 1.5  | 0.5  |
| 0.41 | 1    | 4.9   | 1.6  | 0.4  |
| 0.49 | 0.6  | 4.3   | 0.46 | 0.29 |
| 0.32 | 0.59 | 6.5   | 0.78 | 0.39 |
| 0.42 | 0.52 | 5.4   | 1.34 | 0.54 |
| 0.31 | 0.82 | 11.4  | 1.45 | 0.85 |
| 0.35 | 1.6  | 5.7   | 2.18 | 0.52 |
| 0.2  | 1.12 | 4.3   | 1.38 | 0.38 |
| 0.49 | 0.43 | 7.3   | 1.83 | 1.02 |
| 0.44 | 0.41 | 8.1   | 1.56 | 0.46 |
| 0.44 | 1.05 | 5.7   | 1.36 | 0.51 |
| 0.52 | 1.23 | 6.2   | 1.31 | 0.36 |
| 0.54 | 0.76 | 16.4  | 2.05 | 0.61 |

|      |      |       |      |      |
|------|------|-------|------|------|
| 0.33 | 1.5  | 6.7   | 1.49 | 0.39 |
| 0.47 | 0.82 | 7.7   | 1.94 | 0.86 |
| 0.44 | 1.05 | 7     | 1.28 | 1.26 |
| 0.46 | 1.27 | 5.1   | 1.17 | 0.36 |
| 0.5  | 1.13 | 3.4   | 1.6  | 0.23 |
| 0.34 | 0.65 | 6.4   | 1.66 | 0.56 |
| 0.42 | 0.96 | 8.2   | 2.58 | 0.42 |
| 0.35 | 0.9  | 9.7   | 1.14 | 0.34 |
| 0.1  | 0.96 | 5.4   | 1.48 | 0.48 |
| 0.51 | 0.34 | 7     | 0.84 | 0.57 |
| 0.43 | 0.8  | 6.7   | 0.87 | 0.28 |
| 0.49 | 0.59 | 16.2  | 2.07 | 1.2  |
| 0.42 | 2.58 | 4.2   | 1.82 | 0.36 |
| 0.47 | 0.91 | 12.8  | 0.7  | 1.23 |
| 0.37 | 0.48 | 2.9   | 1.96 | 0.51 |
| 0.44 | 1.05 | 3.2   | 1.32 | 0.49 |
| 0.45 | 0.47 | 5.5   | 0.48 | 0.4  |
| 0.42 | 1.11 | 4.4   | 1.03 | 0.8  |
| 0.44 | 1.05 | 3.9   | 1.22 | 0.33 |
| 0.4  | 0.89 | 13.7  | 1.66 | 0.81 |
| 0.6  | 1.87 | 5.5   | 0.65 | 0.48 |
| 1.71 | 1.06 | 13.9  | 0.65 | 0.44 |
| 0.44 | 1.05 | 6.6   | 0.8  | 0.54 |
| 0.38 | 0.93 | 5.6   | 1.1  | 0.86 |
| 0.38 | 0.96 | 3.2   | 0.28 | 0.3  |
| 0.4  | 0.81 | 6.92  | 1.04 | 0.66 |
| 0.66 | 1.36 | 6.32  | 0.67 | 0.37 |
| 0.54 | 1.56 | 9.14  | 2.11 | 0.75 |
| 0.72 | 0.55 | 7.87  | 2.85 | 0.5  |
| 0.24 | 0.65 | 7.93  | 0.79 | 0.56 |
| 0.49 | 1.11 | 5.8   | 1.16 | 0.43 |
| 0.39 | 0.3  | 9.58  | 2.87 | 0.76 |
| 0.2  | 0.88 | 7.31  | 1.44 | 0.59 |
| 0.61 | 1    | 3.8   | 0.65 | 0.27 |
| 0.44 | 0.92 | 6.53  | 2.7  | 0.36 |
| 0.31 | 1.64 | 5.79  | 1.47 | 0.29 |
| 0.33 | 2    | 6.85  | 1.55 | 0.51 |
| 0.24 | 1.04 | 7.32  | 0.59 | 0.06 |
| 0.27 | 1.16 | 6.13  | 0.8  | 0.45 |
| 0.21 | 1.89 | 4.45  | 0.85 | 0.06 |
| 0.23 | 2.29 | 3.78  | 1.03 | 0.05 |
| 0.44 | 2.33 | 6.48  | 0.74 | 0.8  |
| 0.35 | 0.73 | 10.14 | 1.9  | 0.64 |
| 0.19 | 1.61 | 4.19  | 0.82 | 0.05 |
| 0.34 | 1.04 | 6.7   | 3.21 | 0.23 |
| 0.3  | 0.6  | 4.9   | 1.9  | 0.4  |
| 0.25 | 0.65 | 5.1   | 1.7  | 0.5  |
| 0.28 | 1    | 3.2   | 1.3  | 0.3  |
| 0.26 | 0.63 | 4.5   | 1.2  | 0.4  |
| 0.23 | 0.52 | 5.2   | 1.8  | 0.3  |
| 0.31 | 0.57 | 6.5   | 1.6  | 0.4  |

|      |      |       |      |      |
|------|------|-------|------|------|
| 0.32 | 0.76 | 9     | 1.8  | 0.7  |
| 0.33 | 1.16 | 5.7   | 1    | 0.3  |
| 0.43 | 1.26 | 3.7   | 1    | 0.4  |
| 0.35 | 1.12 | 2.2   | 0.6  | 0.1  |
| 0.36 | 0.48 | 4.6   | 0.4  | 0.1  |
| 0.35 | 1.12 | 2.5   | 1.5  | 0.2  |
| 0.35 | 1.55 | 2.2   | 1.1  | 0.2  |
| 0.27 | 0.49 | 3.6   | 0.4  | 0.3  |
| 0.26 | 0.45 | 1.9   | 1    | 0.2  |
| 0.44 | 1.05 | 7     | 1.28 | 1.26 |
| 0.75 | 1.02 | 4.8   | 0.38 | 0.19 |
| 0.44 | 2.18 | 4.7   | 1.24 | 0.58 |
| 0.36 | 2    | 7     | 1.28 | 1.26 |
| 0.81 | 1.01 | 9.5   | 1.25 | 0.71 |
| 0.47 | 0.68 | 3.8   | 0.93 | 0.64 |
| 0.48 | 1.07 | 12.9  | 2.21 | 62   |
| 0.46 | 1.86 | 3.9   | 0.28 | 0.11 |
| 0.54 | 1    | 3.48  | 0.32 | 0.31 |
| 0.53 | 1    | 7.11  | 2.33 | 0.6  |
| 0.52 | 1    | 15.51 | 3.14 | 0.78 |
| 0.62 | 1.5  | 5.42  | 2.13 | 0.51 |
| 0.45 | 1.36 | 3.49  | 0.81 | 0.26 |
| 0.56 | 0.67 | 6.63  | 1.16 | 0.47 |
| 0.44 | 1.17 | 6.3   | 2.25 | 0.55 |
| 0.4  | 1    | 10.18 | 1.22 | 0.64 |
| 0.44 | 0.65 | 3.59  | 1.24 | 0.1  |
| 0.33 | 0.76 | 9.08  | 1.31 | 0.4  |



| <b>Neutrophilic granulocytes</b> | <b>Monocyte ratio</b> | <b>Lymphocyte ratio</b> | <b>Hematocrit</b> |      |
|----------------------------------|-----------------------|-------------------------|-------------------|------|
|                                  | 1.9                   | 1.8                     | 15.8              | 33.7 |
|                                  | 5.4                   | 0.7                     | 7.1               | 34.5 |
|                                  | 4.1                   | 1.8                     | 3.7               | 35.6 |
|                                  | 1.5                   | 7.3                     | 21.5              | 35.2 |
|                                  | 5.1                   | 7.9                     | 12.8              | 41.2 |
|                                  | 9.8                   | 2.1                     | 5.8               | 44   |
|                                  | 6                     | 5.1                     | 15.4              | 47.8 |
|                                  | 3.3                   | 12.4                    | 21.2              | 40.8 |
|                                  | 8.6                   | 6.6                     | 12.7              | 37.4 |
|                                  | 9.8                   | 2.3                     | 3.8               | 37   |
|                                  | 9.3                   | 6.3                     | 11.3              | 38.1 |
|                                  | 7.3                   | 4.4                     | 6.9               | 32.2 |
|                                  | 16.6                  | 4.6                     | 4.2               | 38.9 |
|                                  | 10                    | 4.5                     | 7.8               | 35.5 |
|                                  | 4.9                   | 5                       | 10                | 30   |
|                                  | 2.6                   | 11.2                    | 26.6              | 32.9 |
|                                  | 2.3                   | 10.3                    | 29.7              | 28.6 |
|                                  | 2.8                   | 8                       | 23.4              | 27.9 |
|                                  | 8.8                   | 3.2                     | 4.2               | 40.6 |
|                                  | 7.2                   | 3.4                     | 3.3               | 38.9 |
|                                  | 7.9                   | 3                       | 2.7               | 35.2 |
|                                  | 8.7                   | 1.9                     | 1.2               | 39.3 |
|                                  | 17.6                  | 1.1                     | 0.9               | 37.1 |
|                                  | 14.4                  | 1.6                     | 1.1               | 34.2 |
|                                  | 10.2                  | 2                       | 1.6               | 27.2 |
|                                  | 9.9                   | 2.7                     | 4.2               | 27.9 |
|                                  | 11.3                  | 0.3                     | 0.8               | 28.1 |
|                                  | 7.3                   | 2.5                     | 5.4               | 23.9 |
|                                  | 10.5                  | 2.4                     | 6.3               | 28.5 |
|                                  | 11.8                  | 2.5                     | 5.8               | 26.4 |
|                                  | 42.4                  | 5.04                    | 16.04             | 0.2  |
|                                  | 11.1                  | 4.6                     | 9                 | 24.4 |
|                                  | 6.9                   | 5                       | 4.5               | 39.6 |
|                                  | 26.9                  | 2.1                     | 1.9               | 37.9 |
|                                  | 3.3                   | 12.4                    | 19                | 38.9 |
|                                  | 7.9                   | 3.8                     | 3.5               | 35.9 |
|                                  | 5.8                   | 14.5                    | 20.3              | 37.7 |
|                                  | 10.3                  | 2.4                     | 3.8               | 37.6 |
|                                  | 1.6                   | 9                       | 48.1              | 41.9 |
|                                  | 2.3                   | 10.2                    | 32.4              | 46.7 |
|                                  | 6                     | 6.1                     | 22.1              | 40.4 |
|                                  | 3.6                   | 5.7                     | 29.4              | 43.7 |
|                                  | 3.6                   | 8.4                     | 28.9              | 38.9 |
|                                  | 5.8                   | 14.5                    | 20.3              | 37.7 |
|                                  | 1.5                   | 13.9                    | 60.6              | 45.5 |
|                                  | 1.2                   | 5.5                     | 79.7              | 45.8 |
|                                  | 5.8                   | 14.5                    | 20.3              | 37.7 |
|                                  | 1.9                   | 6.6                     | 68.6              | 42.4 |
|                                  | 1.3                   | 12.9                    | 32.9              | 38.9 |
|                                  | 7.5                   | 3.7                     | 6.7               | 37.9 |

|       |      |      |      |
|-------|------|------|------|
| 5.21  | 7.5  | 20.1 | 41.6 |
| 4     | 7.5  | 20.7 | 49   |
| 4.6   | 4.1  | 14.3 | 47   |
| 4     | 6    | 10.3 | 39   |
| 4.5   | 17.9 | 11.7 | 23   |
| 9.4   | 6    | 9.8  | 58   |
| 11.7  | 1.8  | 5.1  | 48   |
| 12.2  | 6.8  | 2.8  | 42   |
| 2.5   | 5.9  | 22.3 | 37   |
| 3.2   | 8    | 20   | 38   |
| 3.8   | 10.8 | 18.7 | 34   |
| 2.8   | 6.8  | 18.9 | 45   |
| 5.9   | 2.8  | 18.7 | 43   |
| 3.3   | 4.5  | 20.8 | 18   |
| 9.5   | 8.2  | 11.9 | 42   |
| 5.7   | 4.8  | 9.6  | 31   |
| 8.9   | 6.2  | 13.5 | 36   |
| 5.1   | 9.9  | 31.9 | 38   |
| 2.6   | 10.7 | 21.5 | 37   |
| 2.8   | 5.9  | 35.7 | 41   |
| 6.3   | 5.5  | 16.2 | 38   |
| 3.7   | 14.6 | 8.8  | 48   |
| 2     | 9.1  | 33.1 | 34   |
| 2.3   | 4.9  | 29.6 | 38   |
| 9.5   | 1.1  | 6.6  | 36   |
| 8.2   | 1.6  | 8.9  | 41   |
| 6.5   | 7.4  | 20.2 | 47   |
| 8.7   | 3.6  | 23.1 | 39   |
| 3.2   | 6.5  | 32.9 | 44   |
| 2.9   | 5.1  | 25.4 | 43   |
| 3.9   | 8.2  | 27.8 | 37   |
| 3.2   | 7.2  | 13.4 | 39   |
| 6.2   | 6.4  | 19.6 | 46   |
| 2.8   | 11.7 | 39.9 | 48   |
| 4.2   | 8.2  | 22.8 | 36   |
| 4.5   | 9    | 22.9 | 45   |
| 4.5   | 5.2  | 22.2 | 42   |
| 2.6   | 5.3  | 44.6 | 50   |
| 6.9   | 5.4  | 15.6 | 39   |
| 2.8   | 7.4  | 32.5 | 40   |
| 3.55  | 6.7  | 10.6 | 37.2 |
| 5.19  | 6    | 12   | 42.5 |
| 3.39  | 9.9  | 24.7 | 46.9 |
| 9.08  | 7.4  | 12.7 | 44.5 |
| 3.02  | 9.1  | 38   | 33.7 |
| 2.41  | 8.9  | 32.3 | 45   |
| 4.32  | 13.9 | 25   | 46.1 |
| 5.84  | 5.7  | 20.4 | 50.6 |
| 3.56  | 9    | 23.9 | 43   |
| 4.18  | 5.9  | 21.3 | 137  |
| 13.66 | 3.7  | 12.5 | 34.4 |

|       |      |      |      |
|-------|------|------|------|
| 4.72  | 5.8  | 22.2 | 37.7 |
| 4.86  | 11.1 | 25.1 | 35.7 |
| 5.21  | 7.5  | 20.1 | 41.6 |
| 3.47  | 7    | 22.8 | 45.7 |
| 1.43  | 6.8  | 47.2 | 29.4 |
| 4     | 8.7  | 25.9 | 46.1 |
| 5.06  | 5.1  | 31.4 | 44.5 |
| 8.2   | 3.5  | 11.7 | 41.8 |
| 3.29  | 9    | 27.6 | 42.6 |
| 5.56  | 8.1  | 11.9 | 39.3 |
| 5.52  | 4.2  | 13   | 41.3 |
| 12.73 | 7.4  | 12.8 | 34.6 |
| 1.93  | 8.7  | 43.8 | 34.7 |
| 10.88 | 9.6  | 5.5  | 33.1 |
| 6.19  | 5.7  | 21.9 | 44.8 |
| 1.38  | 15.2 | 40.9 | 41.7 |
| 4.5   | 7.2  | 8.7  | 42   |
| 2.57  | 18   | 23.2 | 36.2 |
| 2.29  | 8.5  | 31.6 | 37.6 |
| 11.22 | 5.9  | 12.1 | 39.9 |
| 4.3   | 8.8  | 11.9 | 24.8 |
| 12.73 | 3.2  | 4.7  | 37.3 |
| 5.21  | 8.2  | 12.1 | 43.7 |
| 3.5   | 15.5 | 19.8 | 51.1 |
| 2.56  | 9.5  | 8.9  | 36.9 |
| 4.95  | 10   | 15   | 44   |
| 5.23  | 6    | 11   | 25.9 |
| 6.01  | 8    | 23   | 41   |
| 4.31  | 6    | 36   | 43.5 |
| 6.57  | 7    | 10   | 52.6 |
| 4.09  | 8    | 20   | 42.8 |
| 5.83  | 8    | 30   | 52.6 |
| 5.16  | 8    | 20   | 52.8 |
| 2.79  | 7    | 17   | 37.9 |
| 3.35  | 6    | 41   | 46   |
| 3.82  | 5    | 25   | 31.1 |
| 4.59  | 7    | 23   | 42.5 |
| 6.64  | 1    | 8    | 34   |
| 4.84  | 7    | 13   | 42.6 |
| 3.06  | 1    | 19   | 35.1 |
| 2.44  | 1    | 27   | 26   |
| 4.83  | 12   | 11   | 36.4 |
| 7.34  | 6    | 19   | 30.2 |
| 2.68  | 1    | 20   | 23.8 |
| 3.17  | 3    | 48   | 43.7 |
| 2.6   | 7.2  | 38.4 | 46.2 |
| 2.9   | 9.1  | 33.1 | 45.9 |
| 1.5   | 9.9  | 41.4 | 34   |
| 2.9   | 8.8  | 26.7 | 36.8 |
| 2.9   | 5.4  | 35.5 | 49   |
| 4.5   | 6.6  | 24.2 | 39.9 |

|       |      |      |      |
|-------|------|------|------|
| 6.5   | 7.7  | 19.5 | 38.3 |
| 4.3   | 6    | 17.7 | 36   |
| 2.3   | 9.5  | 26.8 | 46.2 |
| 1.5   | 2.3  | 27.8 | 48.2 |
| 4.2   | 2.4  | 8.2  | 41.8 |
| 0.8   | 8.5  | 59.5 | 36.8 |
| 0.8   | 11   | 52.8 | 34.4 |
| 2.8   | 9.1  | 12.2 | 37.4 |
| 0.6   | 12.3 | 53.4 | 29.8 |
| 5.21  | 7.5  | 20.1 | 41.6 |
| 4.22  | 3.9  | 7.9  | 59   |
| 2.86  | 12.3 | 26.3 | 36.4 |
| 5.21  | 7.5  | 20.1 | 41.6 |
| 6.84  | 7.5  | 13.2 | 41.5 |
| 2.18  | 16.8 | 24.4 | 41.1 |
| 9.72  | 4.8  | 17.1 | 43.2 |
| 3.49  | 2.8  | 7.2  | 27.4 |
| 2.81  | 9    | 9    | 37   |
| 4.08  | 8    | 33   | 40   |
| 11.33 | 5    | 20   | 43.9 |
| 2.41  | 9    | 39   | 43.6 |
| 2.26  | 7    | 23   | 38   |
| 4.58  | 7    | 18   | 45   |
| 3.27  | 9    | 36   | 39.5 |
| 8.31  | 6    | 12   | 36.5 |
| 2.08  | 3    | 35   | 44.6 |
| 7.3   | 4    | 14   | 40.1 |

**Neutrophile granulocyte ratio**

|  | <b>Hemoglobin</b> | <b>Red blood cell distribution width - SD</b> |      |
|--|-------------------|-----------------------------------------------|------|
|  | 82                | 111                                           | 47.4 |
|  | 92                | 112                                           | 51.3 |
|  | 95                | 115                                           | 51.7 |
|  | 69                | 112                                           | 67.2 |
|  | 79                | 133                                           | 41.9 |
|  | 92                | 145                                           | 40.9 |
|  | 79                | 163                                           | 35.5 |
|  | 65                | 137                                           | 38   |
|  | 80                | 118                                           | 42.4 |
|  | 94                | 122                                           | 39   |
|  | 81                | 115                                           | 45.8 |
|  | 89                | 95                                            | 45.8 |
|  | 91                | 119                                           | 51.8 |
|  | 86                | 106                                           | 54.9 |
|  | 84                | 90                                            | 54.4 |
|  | 62                | 133                                           | 44.5 |
|  | 59                | 114                                           | 44   |
|  | 67                | 119                                           | 44.7 |
|  | 92                | 133                                           | 37.6 |
|  | 93                | 128                                           | 39.5 |
|  | 94                | 113                                           | 39.8 |
|  | 97                | 121                                           | 42.5 |
|  | 98                | 115                                           | 42.1 |
|  | 97                | 107                                           | 42.5 |
|  | 96                | 85                                            | 43.2 |
|  | 93                | 89                                            | 43.6 |
|  | 99                | 88                                            | 47.8 |
|  | 91                | 73                                            | 48.5 |
|  | 90                | 91                                            | 48.6 |
|  | 91                | 85                                            | 46.2 |
|  | 79                | 76                                            | 44.3 |
|  | 86                | 82                                            | 49.9 |
|  | 90                | 140                                           | 37   |
|  | 95                | 126                                           | 47.7 |
|  | 68                | 127                                           | 40.6 |
|  | 92                | 118                                           | 41.1 |
|  | 72                | 125                                           | 42.3 |
|  | 94                | 123                                           | 41.9 |
|  | 41                | 138                                           | 37.3 |
|  | 56                | 155                                           | 37.2 |
|  | 72                | 132                                           | 37.8 |
|  | 62                | 147                                           | 36.1 |
|  | 61                | 127                                           | 37.1 |
|  | 72                | 125                                           | 42.3 |
|  | 24                | 143                                           | 41   |
|  | 13                | 148                                           | 38.5 |
|  | 72                | 125                                           | 42.3 |
|  | 23                | 136                                           | 39.9 |
|  | 53                | 129                                           | 37.8 |
|  | 90                | 128                                           | 36.4 |

|      |      |      |
|------|------|------|
| 69.9 | 134  | 43.9 |
| 69.5 | 158  | 44.9 |
| 80.7 | 158  | 89.5 |
| 81.1 | 131  | 51.6 |
| 69.7 | 76   | 47.1 |
| 83.9 | 192  | 51.3 |
| 91.9 | 164  | 43.9 |
| 90.1 | 141  | 41.9 |
| 68.9 | 118  | 50.5 |
| 68.3 | 128  | 44.2 |
| 69.6 | 124  | 51.7 |
| 68.1 | 146  | 46.1 |
| 77.4 | 143  | 42.8 |
| 73   | 64   | 45.2 |
| 79.3 | 144  | 38.7 |
| 85.3 | 105  | 41.1 |
| 80.1 | 116  | 35.2 |
| 57.4 | 129  | 42.1 |
| 67.1 | 124  | 46.9 |
| 57.8 | 132  | 49.6 |
| 77.7 | 129  | 43.3 |
| 76.4 | 164  | 46.5 |
| 56.2 | 113  | 48.3 |
| 62.6 | 120  | 55   |
| 92.3 | 119  | 45.6 |
| 89.3 | 132  | 43.3 |
| 69.5 | 160  | 47.4 |
| 73   | 132  | 43.5 |
| 58   | 144  | 43.8 |
| 67.9 | 140  | 43.9 |
| 59.1 | 123  | 44.2 |
| 78.1 | 131  | 49.6 |
| 71.6 | 160  | 44   |
| 43.8 | 164  | 43.7 |
| 67.6 | 123  | 40.7 |
| 66.3 | 153  | 42.6 |
| 72.1 | 140  | 45.3 |
| 48.6 | 170  | 46   |
| 75   | 132  | 40.6 |
| 58.1 | 135  | 45.7 |
| 82   | 128  | 39.9 |
| 80   | 145  | 42.4 |
| 62.4 | 156  | 45.2 |
| 79.3 | 149  | 41.3 |
| 52.5 | 118  | 59.7 |
| 56.5 | 147  | 47.4 |
| 58.9 | 166  | 39.6 |
| 71.7 | 150  | 40.7 |
| 62.6 | 144  | 49.4 |
| 67.7 | 4.59 | 12.3 |
| 83.5 | 120  | 42.6 |

|      |     |      |
|------|-----|------|
| 70.4 | 133 | 40.7 |
| 62.9 | 118 | 46.9 |
| 69.9 | 134 | 43.9 |
| 67.5 | 154 | 39.1 |
| 42.2 | 106 | 57.4 |
| 62.5 | 156 | 44.2 |
| 61.6 | 152 | 39.6 |
| 84.6 | 147 | 42   |
| 61.3 | 147 | 47.8 |
| 79   | 133 | 41.8 |
| 82.5 | 140 | 37.9 |
| 78.8 | 113 | 46.4 |
| 46.3 | 115 | 45.6 |
| 84.7 | 117 | 40.7 |
| 69.3 | 156 | 41.7 |
| 42.7 | 139 | 40.6 |
| 21.5 | 145 | 42.5 |
| 57.9 | 124 | 43   |
| 59.3 | 127 | 40.3 |
| 81.8 | 141 | 39   |
| 78.9 | 76  | 45.4 |
| 91.7 | 129 | 13.4 |
| 79   | 150 | 44.4 |
| 63.3 | 172 | 38.5 |
| 81.3 | 126 | 47   |
| 72   | 142 | 52   |
| 83   | 84  | 45   |
| 66   | 128 | 42   |
| 55   | 135 | 45   |
| 83   | 167 | 47   |
| 71   | 133 | 44   |
| 61   | 164 | 45   |
| 71   | 166 | 44   |
| 73   | 116 | 40   |
| 51   | 159 | 40   |
| 66   | 104 | 44   |
| 67   | 138 | 44   |
| 91   | 117 | 52   |
| 79   | 152 | 42   |
| 69   | 119 | 47   |
| 65   | 90  | 58   |
| 75   | 121 | 50   |
| 72   | 95  | 54   |
| 64   | 78  | 63   |
| 47   | 146 | 57   |
| 53   | 151 | 39.6 |
| 57   | 150 | 40.4 |
| 48   | 151 | 37   |
| 63   | 142 | 36.9 |
| 57   | 169 | 40.5 |
| 69   | 126 | 42.1 |

|      |     |      |
|------|-----|------|
| 72   | 119 | 44.3 |
| 75   | 113 | 49.5 |
| 62   | 148 | 38.6 |
| 69   | 155 | 38.9 |
| 89   | 133 | 39.5 |
| 32   | 124 | 42.6 |
| 36   | 114 | 41.1 |
| 79   | 129 | 37.2 |
| 34   | 104 | 39.8 |
| 69.9 | 134 | 43.9 |
| 87.6 | 201 | 52.3 |
| 60.6 | 122 | 48.5 |
| 69.9 | 134 | 43.9 |
| 72   | 135 | 42.5 |
| 57.2 | 141 | 43.5 |
| 75.4 | 143 | 13.8 |
| 90   | 94  | 40.9 |
| 81   | 119 | 49   |
| 57   | 129 | 51   |
| 73   | 142 | 38   |
| 45   | 136 | 45   |
| 65   | 114 | 48   |
| 69   | 150 | 44   |
| 52   | 129 | 41   |
| 82   | 121 | 41   |
| 58   | 148 | 46   |
| 81   | 163 | 43   |



**Red blood cell distribution width - CV****Red blood cell count**

|      |      |
|------|------|
| 14.1 | 3.66 |
| 15.4 | 3.68 |
| 15.2 | 3.75 |
| 17.9 | 3.44 |
| 13.5 | 4.84 |
| 11.9 | 4.76 |
| 11.2 | 5.39 |
| 11.7 | 4.5  |
| 12.4 | 4.05 |
| 12.1 | 4.17 |
| 13.9 | 4.06 |
| 13.9 | 3.39 |
| 16   | 4.09 |
| 15.9 | 3.69 |
| 15.9 | 3.16 |
| 13   | 3.27 |
| 13.3 | 2.8  |
| 13.5 | 2.72 |
| 12.1 | 4.76 |
| 12.8 | 4.6  |
| 12.8 | 4.1  |
| 12.8 | 4.37 |
| 12.8 | 4.15 |
| 13   | 3.81 |
| 13.4 | 3.07 |
| 13.5 | 3.17 |
| 14.6 | 3.09 |
| 14.6 | 2.64 |
| 15   | 3.23 |
| 14.6 | 3    |
| 14.9 | 2.57 |
| 17.9 | 2.83 |
| 11.4 | 4.44 |
| 13.3 | 3.89 |
| 12.1 | 4.27 |
| 12.4 | 4.01 |
| 16   | 4.16 |
| 12.8 | 4.18 |
| 11.1 | 4.47 |
| 11   | 5.06 |
| 11   | 4.28 |
| 10.8 | 4.85 |
| 10.9 | 4.24 |
| 16   | 4.16 |
| 13.6 | 5.46 |
| 13   | 5.62 |
| 16   | 4.16 |
| 13.2 | 5.1  |
| 11.4 | 4.28 |
| 11.2 | 4.2  |

|      |      |
|------|------|
| 14.3 | 4.38 |
| 13.9 | 5.6  |
| 20.8 | 5.75 |
| 14.7 | 4.1  |
| 13.8 | 2.5  |
| 14.1 | 5.9  |
| 12.5 | 5    |
| 13   | 4.9  |
| 16   | 4.3  |
| 13   | 4.1  |
| 13.5 | 3.3  |
| 14   | 5    |
| 13.2 | 4.9  |
| 14.3 | 2.1  |
| 12.2 | 4.9  |
| 14.4 | 4.1  |
| 14.7 | 5.5  |
| 12.5 | 4.2  |
| 13.4 | 3.9  |
| 13.6 | 4.1  |
| 12.6 | 4.07 |
| 12.9 | 4.9  |
| 14.8 | 3.88 |
| 14.7 | 3.68 |
| 13.8 | 3.99 |
| 12.9 | 4.45 |
| 13.6 | 4.85 |
| 12.4 | 4    |
| 13.5 | 4.89 |
| 12.7 | 4.51 |
| 14.4 | 4.41 |
| 14.9 | 4.29 |
| 13   | 4.95 |
| 13.2 | 5.28 |
| 12.6 | 4.13 |
| 13   | 5.01 |
| 13.4 | 4.62 |
| 12.4 | 4.97 |
| 12.5 | 4.4  |
| 13.1 | 4.18 |
| 12.8 | 4.32 |
| 12.4 | 4.46 |
| 4.5  | 5.4  |
| 12.5 | 4.98 |
| 13.6 | 2.87 |
| 13.2 | 4.6  |
| 12.3 | 5.24 |
| 13.5 | 5.59 |
| 13.9 | 4.46 |
| 37.5 | 0.01 |
| 13.4 | 3.96 |

|       |      |
|-------|------|
| 13.1  | 4.28 |
| 14.3  | 3.88 |
| 14.3  | 4.38 |
| 12.3  | 5.28 |
| 21.3  | 3.32 |
| 13.3  | 5.08 |
| 11.9  | 4.9  |
| 13    | 4.73 |
| 13.4  | 4.47 |
| 12.8  | 4.45 |
| 11.8  | 4.71 |
| 13.6  | 3.7  |
| 12.2  | 3.48 |
| 11.9  | 3.59 |
| 13.2  | 5.18 |
| 11.3  | 4.28 |
| 12.8  | 4.63 |
| 13    | 3.98 |
| 12.3  | 4.18 |
| 12.5  | 4.63 |
| 15.7  | 3.07 |
| 41.7  | 4.27 |
| 12.6  | 4.6  |
| 12.1  | 5.83 |
| 13.2  | 3.84 |
| 17.4  | 5.23 |
| 12.9  | 2.64 |
| 13.4  | 4.66 |
| 13.7  | 4.67 |
| 13.7  | 5.39 |
| 13.2  | 4.54 |
| 12.9  | 5.28 |
| 12.9  | 5.5  |
| 14.1  | 4.66 |
| 12.3  | 5.2  |
| 12.9  | 3.35 |
| 13.4  | 1.68 |
| 14.5  | 3.46 |
| 12.7  | 4.67 |
| 15.1  | 4.11 |
| 14.3  | 2.85 |
| 13    | 3.71 |
| 16.5  | 3.35 |
| 16.9  | 2.34 |
| 14.5  | 4.91 |
| 12.2  | 5.19 |
| 12.4  | 5.22 |
| 13.3  | 3.53 |
| 12.6  | 3.9  |
| 12.4  | 5.41 |
| 112.9 | 4.39 |

|      |      |
|------|------|
| 13.4 | 4.15 |
| 14.6 | 3.87 |
| 12.1 | 5.37 |
| 12.3 | 5.58 |
| 12.5 | 4.83 |
| 12.3 | 3.92 |
| 11.9 | 3.66 |
| 11.3 | 4.13 |
| 11.7 | 3.02 |
| 14.3 | 4.38 |
| 14.9 | 6.15 |
| 14.2 | 3.9  |
| 14.3 | 4.38 |
| 13.1 | 4.68 |
| 12.2 | 4.25 |
| 42.3 | 4.98 |
| 11.8 | 2.86 |
| 14.8 | 4.02 |
| 16   | 4.6  |
| 11.8 | 4.8  |
| 15.5 | 5.4  |
| 13.8 | 3.84 |
| 13.8 | 5.18 |
| 12.8 | 4.47 |
| 12.4 | 3.87 |
| 15.1 | 5.4  |
| 13   | 4.4  |

| Mean corpuscular volume | Large platelet ratio | Mean corpuscular hemoglobin |      |
|-------------------------|----------------------|-----------------------------|------|
| 92.1                    |                      | 29                          | 30.3 |
| 93.8                    |                      | 29                          | 30.4 |
| 94.9                    |                      | 29                          | 30.7 |
| 102.6                   |                      | 30                          | 32.6 |
| 85.1                    |                      | 27                          | 27.5 |
| 92.4                    |                      | 22                          | 30.5 |
| 88.7                    |                      | 19                          | 30.2 |
| 90.7                    |                      | 20                          | 30.4 |
| 92.3                    |                      | 35                          | 29.1 |
| 88.7                    |                      | 25                          | 29.3 |
| 93.8                    |                      | 35                          | 28.3 |
| 95                      |                      | 39                          | 28   |
| 95.1                    |                      | 39                          | 29.1 |
| 96.2                    |                      | 28                          | 28.7 |
| 94.9                    |                      | 27                          | 28.5 |
| 100.6                   |                      | 35                          | 40.7 |
| 102.1                   |                      | 31                          | 40.7 |
| 102.6                   |                      | 29                          | 43.8 |
| 85.3                    |                      | 34                          | 27.9 |
| 84.6                    |                      | 37                          | 27.8 |
| 85.9                    |                      | 37                          | 27.6 |
| 89.9                    |                      | 40                          | 27.7 |
| 89.4                    |                      | 40                          | 27.7 |
| 89.8                    |                      | 44                          | 28.1 |
| 88.6                    |                      | 40                          | 27.7 |
| 88                      |                      | 38                          | 28.1 |
| 90.9                    |                      | 35                          | 28.5 |
| 90.5                    |                      | 39                          | 27.7 |
| 88.2                    |                      | 37                          | 28.2 |
| 88                      |                      | 49                          | 28.3 |
| 88.3                    |                      | 43                          | 29.6 |
| 86.2                    |                      | 33                          | 29   |
| 89.2                    |                      | 27                          | 31.5 |
| 97.4                    |                      | 48                          | 32.4 |
| 91.1                    |                      | 36                          | 29.7 |
| 89.5                    |                      | 39                          | 29.4 |
| 91.2                    |                      | 33                          | 30   |
| 90                      |                      | 37                          | 29.4 |
| 93.7                    |                      | 44                          | 30.9 |
| 92.3                    |                      | 41                          | 30.6 |
| 94.4                    |                      | 45                          | 30.8 |
| 90.1                    |                      | 45                          | 30.3 |
| 91.7                    |                      | 38                          | 30   |
| 91.2                    |                      | 33                          | 30   |
| 83.3                    |                      | 27                          | 26.2 |
| 81.5                    |                      | 15                          | 26.3 |
| 91.2                    |                      | 33                          | 30   |
| 83.1                    |                      | 16                          | 26.7 |
| 90.9                    |                      | 32                          | 30.1 |
| 90.2                    |                      | 24                          | 30.5 |

|       |      |      |
|-------|------|------|
| 91    | 31.6 | 31.6 |
| 87.5  | 43.4 | 28   |
| 117.6 | 28.2 | 39.5 |
| 95.2  | 25.9 | 31.6 |
| 92.4  | 20.4 | 31   |
| 98.8  | 37.9 | 32.7 |
| 95.7  | 30.4 | 32.5 |
| 87.3  | 31.4 | 29.1 |
| 85.8  | 30.9 | 27.4 |
| 92.2  | 19.1 | 31.5 |
| 103   | 20.4 | 37   |
| 89.9  | 39.1 | 29.1 |
| 88    | 32.1 | 29   |
| 86.9  | 21.5 | 30.8 |
| 85.6  | 19   | 29.5 |
| 77.4  | 30.4 | 25.8 |
| 64.7  | 40.5 | 21.2 |
| 90.9  | 19.7 | 30.7 |
| 95.1  | 27.4 | 31.6 |
| 99.1  | 56.4 | 31.8 |
| 94    | 34.8 | 31.7 |
| 99    | 36   | 33.5 |
| 88    | 19   | 29.2 |
| 102   | 23.3 | 32.7 |
| 91    | 29.2 | 29.8 |
| 91    | 42.2 | 29.6 |
| 96    | 54.2 | 33.1 |
| 96    | 29.6 | 32.9 |
| 89    | 31.1 | 29.4 |
| 95    | 43.8 | 31.1 |
| 84    | 33.7 | 28   |
| 91    | 61.8 | 30.5 |
| 93    | 27.5 | 32.3 |
| 91    | 29.1 | 31   |
| 88    | 21.7 | 29.9 |
| 90    | 22   | 30.6 |
| 92    | 16   | 30.2 |
| 102   | 32.9 | 34.3 |
| 89    | 25.6 | 29.9 |
| 96    | 44.3 | 32.3 |
| 86.1  | 31.6 | 29.6 |
| 95.3  | 31.6 | 32.5 |
| 86.9  | 31.6 | 28.9 |
| 89.4  | 31.6 | 29.9 |
| 117.4 | 31.6 | 41.1 |
| 97.8  | 31.6 | 32   |
| 88    | 31.6 | 31.7 |
| 90.5  | 31.6 | 26.8 |
| 96.4  | 31.6 | 32.3 |
| 39.3  | 31.6 | 85.5 |
| 86.9  | 31.6 | 30.3 |

|       |      |      |
|-------|------|------|
| 88.1  | 31.6 | 31.1 |
| 92    | 31.6 | 30.4 |
| 91    | 31.6 | 31.6 |
| 85.6  | 31.6 | 29.2 |
| 88.6  | 31.6 | 31.9 |
| 90.7  | 31.6 | 30.7 |
| 90.8  | 31.6 | 31   |
| 88.4  | 31.6 | 31.1 |
| 95.3  | 31.6 | 32.9 |
| 88.3  | 31.6 | 29.9 |
| 87.7  | 31.6 | 29.7 |
| 93.5  | 31.6 | 30.5 |
| 99.7  | 31.6 | 33   |
| 92.2  | 31.6 | 32.6 |
| 86.5  | 31.6 | 30.1 |
| 97.4  | 31.6 | 32.5 |
| 90.7  | 31.6 | 31.3 |
| 91    | 31.6 | 31.2 |
| 90    | 31.6 | 30.4 |
| 86.2  | 31.6 | 30.5 |
| 80.8  | 31.6 | 24.8 |
| 87.3  | 31.6 | 30.2 |
| 95    | 31.6 | 32.6 |
| 87.7  | 31.6 | 29.5 |
| 96.1  | 31.6 | 32.8 |
| 83.9  | 20.3 | 27.2 |
| 98.2  | 22.1 | 31.7 |
| 87.1  | 21.5 | 27.5 |
| 93.2  | 15   | 28.9 |
| 97.6  | 27   | 30.9 |
| 94.1  | 36.1 | 29.2 |
| 99.6  | 25   | 31.1 |
| 96    | 31.2 | 30.3 |
| 81.4  | 22   | 24.8 |
| 89.2  | 34   | 30.6 |
| 93.7  | 42   | 31   |
| 90.8  | 31.6 | 29.5 |
| 98.3  | 52.3 | 33.8 |
| 91.2  | 25.3 | 32.5 |
| 85.4  | 14.8 | 29   |
| 91.2  | 32.9 | 31.6 |
| 98    | 32.9 | 32.6 |
| 90.1  | 36.3 | 28.4 |
| 101.7 | 38.4 | 33.3 |
| 89    | 32.9 | 29.7 |
| 89    | 51   | 29.1 |
| 87.9  | 34   | 28.7 |
| 96.3  | 33   | 42.8 |
| 94.4  | 35   | 36.4 |
| 90.6  | 37   | 31.2 |
| 90.9  | 31   | 28.7 |

|      |      |      |
|------|------|------|
| 92.3 | 29   | 28.7 |
| 93   | 25   | 29.2 |
| 86   | 35   | 27.6 |
| 86.4 | 28   | 27.8 |
| 86.5 | 24   | 27.5 |
| 93.9 | 35   | 31.6 |
| 94   | 38   | 31.1 |
| 90.6 | 43   | 31.2 |
| 98.7 | 45   | 34.4 |
| 91   | 31.6 | 31.6 |
| 95.9 | 31.6 | 32.7 |
| 93.3 | 31.6 | 31.3 |
| 91   | 31.6 | 31.6 |
| 88.7 | 31.6 | 28.8 |
| 97.4 | 31.6 | 33.2 |
| 86.7 | 31.6 | 28.7 |
| 95.8 | 31.6 | 32.9 |
| 91.8 | 29.2 | 29.6 |
| 87.6 | 20   | 28   |
| 91.4 | 15   | 29.5 |
| 80.9 | 14.7 | 25.1 |
| 99.2 | 35.3 | 29.6 |
| 86.9 | 19.5 | 29   |
| 88.4 | 19.6 | 28.9 |
| 94.2 | 26.5 | 31.3 |
| 82.6 | 18.2 | 27.4 |
| 91.1 | 30.3 | 37   |



**Mean corpuscular hemoglobin concentration**

|     | <b>Platelet</b> | <b>Plateletcrit</b> |  |
|-----|-----------------|---------------------|--|
| 329 | 168             | 0.18                |  |
| 325 | 194             | 0.2                 |  |
| 323 | 176             | 0.19                |  |
| 317 | 159             | 0.17                |  |
| 323 | 220             | 0.23                |  |
| 330 | 289             | 0.28                |  |
| 341 | 265             | 0.25                |  |
| 336 | 117             | 0.11                |  |
| 316 | 265             | 0.3                 |  |
| 330 | 389             | 0.39                |  |
| 302 | 237             | 0.27                |  |
| 295 | 210             | 0.25                |  |
| 306 | 336             | 0.4                 |  |
| 299 | 239             | 0.25                |  |
| 300 | 250             | 0.26                |  |
| 404 | 188             | 0.21                |  |
| 399 | 200             | 0.22                |  |
| 427 | 206             | 0.22                |  |
| 328 | 192             | 0.22                |  |
| 329 | 166             | 0.19                |  |
| 321 | 149             | 0.17                |  |
| 308 | 127             | 0.15                |  |
| 310 | 158             | 0.19                |  |
| 313 | 149             | 0.18                |  |
| 313 | 134             | 0.16                |  |
| 319 | 137             | 0.16                |  |
| 313 | 67              | 0.07                |  |
| 305 | 39              | 0.04                |  |
| 319 | 53              | 0.06                |  |
| 322 | 48              | 0.06                |  |
| 335 | 51              | 0.06                |  |
| 336 | 28              | 0.21                |  |
| 354 | 220             | 0.22                |  |
| 332 | 55              | 0.07                |  |
| 326 | 129             | 0.15                |  |
| 329 | 140             | 0.16                |  |
| 329 | 193             | 0.21                |  |
| 327 | 176             | 0.2                 |  |
| 329 | 185             | 0.23                |  |
| 332 | 187             | 0.22                |  |
| 327 | 115             | 0.14                |  |
| 336 | 206             | 0.25                |  |
| 326 | 229             | 0.26                |  |
| 329 | 193             | 0.21                |  |
| 314 | 125             | 0.13                |  |
| 323 | 427             | 0.37                |  |
| 329 | 193             | 0.21                |  |
| 321 | 282             | 0.26                |  |
| 332 | 130             | 0.14                |  |
| 338 | 357             | 0.35                |  |

|     |     |       |
|-----|-----|-------|
| 337 | 200 | 0.23  |
| 319 | 195 | 0.24  |
| 336 | 126 | 0.13  |
| 333 | 156 | 0.15  |
| 336 | 215 | 0.2   |
| 331 | 205 | 0.23  |
| 340 | 162 | 0.17  |
| 333 | 157 | 0.17  |
| 320 | 96  | 0.1   |
| 341 | 188 | 0.17  |
| 359 | 152 | 0.14  |
| 324 | 125 | 0.15  |
| 330 | 218 | 0.23  |
| 355 | 77  | 0.07  |
| 344 | 284 | 0.25  |
| 333 | 245 | 0.26  |
| 328 | 266 | 0.3   |
| 338 | 178 | 0.16  |
| 333 | 142 | 0.15  |
| 321 | 110 | 0.15  |
| 337 | 292 | 0.33  |
| 340 | 99  | 0.11  |
| 333 | 154 | 0.14  |
| 321 | 182 | 0.18  |
| 329 | 345 | 0.36  |
| 325 | 158 | 0.2   |
| 345 | 151 | 0.21  |
| 342 | 192 | 0.2   |
| 330 | 189 | 0.21  |
| 329 | 107 | 0.14  |
| 333 | 337 | 0.38  |
| 334 | 76  | 0.12  |
| 349 | 235 | 0.24  |
| 343 | 200 | 0.21  |
| 339 | 430 | 0.41  |
| 341 | 240 | 0.23  |
| 330 | 159 | 0.14  |
| 338 | 145 | 0.16  |
| 338 | 441 | 0.44  |
| 338 | 176 | 0.22  |
| 344 | 56  | 0.06  |
| 341 | 104 | 0.14  |
| 333 | 86  | 0.23  |
| 335 | 218 | 0.27  |
| 350 | 156 | 0.18  |
| 327 | 281 | 1.33  |
| 360 | 94  | 0.13  |
| 296 | 340 | 0.39  |
| 335 | 93  | 0.13  |
| 348 | 217 | 0.202 |
| 349 | 183 | 0.24  |

|     |     |       |
|-----|-----|-------|
| 353 | 257 | 0.29  |
| 331 | 371 | 0.38  |
| 337 | 200 | 0.23  |
| 337 | 141 | 0.19  |
| 361 | 244 | 0.26  |
| 338 | 246 | 0.26  |
| 342 | 335 | 0.35  |
| 352 | 205 | 0.24  |
| 345 | 186 | 0.24  |
| 338 | 245 | 0.29  |
| 339 | 243 | 0.25  |
| 327 | 202 | 0.25  |
| 331 | 114 | 0.13  |
| 353 | 214 | 0.22  |
| 348 | 366 | 0.36  |
| 333 | 196 | 0.21  |
| 345 | 149 | 0.18  |
| 343 | 133 | 0.15  |
| 338 | 234 | 0.26  |
| 353 | 223 | 0.23  |
| 306 | 175 | 0.2   |
| 346 | 250 | 0.234 |
| 343 | 177 | 0.2   |
| 337 | 146 | 0.16  |
| 341 | 153 | 0.16  |
| 323 | 408 | 0.38  |
| 322 | 337 | 0.32  |
| 315 | 359 | 0.34  |
| 310 | 201 | 0.16  |
| 317 | 220 | 0.22  |
| 310 | 147 | 0.17  |
| 313 | 253 | 0.25  |
| 315 | 148 | 0.16  |
| 305 | 367 | 0.34  |
| 343 | 186 | 0.2   |
| 331 | 68  | 0.08  |
| 325 | 206 | 0.22  |
| 344 | 157 | 0.21  |
| 357 | 208 | 0.21  |
| 339 | 377 | 0.34  |
| 346 | 80  | 0.08  |
| 333 | 154 | 0.16  |
| 315 | 247 | 0.29  |
| 328 | 120 | 0.15  |
| 334 | 245 | 0.22  |
| 327 | 109 | 0.15  |
| 327 | 163 | 0.18  |
| 444 | 187 | 0.21  |
| 386 | 240 | 0.27  |
| 345 | 181 | 0.21  |
| 316 | 396 | 0.43  |

|     |     |       |
|-----|-----|-------|
| 311 | 345 | 0.36  |
| 314 | 225 | 0.23  |
| 320 | 138 | 0.15  |
| 322 | 241 | 0.25  |
| 318 | 319 | 0.32  |
| 337 | 157 | 0.18  |
| 331 | 142 | 0.16  |
| 345 | 126 | 0.15  |
| 349 | 95  | 0.12  |
| 337 | 200 | 0.23  |
| 341 | 85  | 0.1   |
| 335 | 205 | 0.2   |
| 337 | 200 | 0.23  |
| 312 | 343 | 0.38  |
| 341 | 209 | 0.23  |
| 331 | 336 | 0.251 |
| 343 | 216 | 0.23  |
| 322 | 77  | 0.08  |
| 320 | 258 | 0.24  |
| 323 | 355 | 0.3   |
| 311 | 339 | 0.28  |
| 299 | 156 | 0.18  |
| 333 | 148 | 0.14  |
| 327 | 270 | 0.25  |
| 332 | 144 | 0.15  |
| 332 | 204 | 0.19  |
| 406 | 262 | 0.28  |

| Mean platelet volume | Platelet distribution width | Basophil ratio | Eosinophil ratio |      |
|----------------------|-----------------------------|----------------|------------------|------|
| 10.6                 |                             | 11.5           | 0.4              | 0    |
| 10.5                 |                             | 12.3           | 0.2              | 0    |
| 10.6                 |                             | 12             | 0                | 0    |
| 10.8                 |                             | 12.2           | 0.5              | 1.4  |
| 10.3                 |                             | 10.7           | 0.2              | 0    |
| 9.7                  |                             | 10.4           | 0.3              | 0.3  |
| 9.3                  |                             | 9.6            | 0.7              | 0    |
| 9.4                  |                             | 9.9            | 0.4              | 0.8  |
| 11.2                 |                             | 13.6           | 0.3              | 0    |
| 10                   |                             | 11             | 0.2              | 0    |
| 11.4                 |                             | 13.4           | 0.5              | 0.8  |
| 11.8                 |                             | 13.8           | 0.1              | 0    |
| 11.9                 |                             | 14.9           | 0.3              | 0    |
| 10.5                 |                             | 11.3           | 0.3              | 1.4  |
| 10.3                 |                             | 11.4           | 0                | 1.2  |
| 11.4                 |                             | 13.3           | 0.2              | 0.5  |
| 10.9                 |                             | 12.9           | 0.5              | 1    |
| 10.5                 |                             | 11.8           | 0.2              | 1    |
| 11.2                 |                             | 13.7           | 0.2              | 0    |
| 11.5                 |                             | 14.2           | 0.1              | 0    |
| 11.5                 |                             | 15.7           | 0.6              | 0    |
| 12                   |                             | 15.8           | 0.2              | 0    |
| 11.9                 |                             | 14.8           | 0.2              | 0    |
| 12.4                 |                             | 15.3           | 0.1              | 0    |
| 12                   |                             | 15             | 0                | 0    |
| 11.6                 |                             | 13.4           | 0.1              | 0.1  |
| 11                   |                             | 14.5           | 0.1              | 0.1  |
| 11.6                 |                             | 14.6           | 0.1              | 0.8  |
| 11.6                 |                             | 14.6           | 0.2              | 1    |
| 13.3                 |                             | 18.2           | 0.2              | 0.8  |
| 12.6                 |                             | 21.3           | 0.34             | 0.24 |
| 11                   |                             | 13.4           | 0.2              | 0.7  |
| 10.1                 |                             | 11.7           | 0.3              | 0    |
| 12.8                 |                             | 17.5           | 0.6              | 0    |
| 11.3                 |                             | 13.1           | 0.2              | 0    |
| 11.6                 |                             | 13.8           | 0.1              | 0.3  |
| 11                   |                             | 13.4           | 0.3              | 0.7  |
| 11.5                 |                             | 15.3           | 0.1              | 0    |
| 12.3                 |                             | 15.9           | 0.5              | 1.6  |
| 11.9                 |                             | 15.3           | 0.2              | 1.5  |
| 12.4                 |                             | 17.5           | 0.2              | 0.1  |
| 12.4                 |                             | 16.5           | 0.5              | 2.9  |
| 11.6                 |                             | 14.8           | 0.5              | 1.7  |
| 11                   |                             | 13.4           | 0.3              | 0.7  |
| 10.3                 |                             | 11             | 1.2              | 0.5  |
| 8.7                  |                             | 9.5            | 0.3              | 1.1  |
| 11                   |                             | 13.4           | 0.3              | 0.7  |
| 9.1                  |                             | 9.3            | 0.4              | 1.4  |
| 10.9                 |                             | 12.8           | 0.4              | 0.4  |
| 9.8                  |                             | 10.7           | 0.1              | 0    |

|      |      |     |     |
|------|------|-----|-----|
| 11   | 15   | 0.3 | 1.3 |
| 12.2 | 16.9 | 0.7 | 1.6 |
| 10   | 16.5 | 0   | 0.9 |
| 9.8  | 16.9 | 0.5 | 2.1 |
| 9.1  | 15.9 | 0.1 | 0.6 |
| 11.4 | 16.5 | 0.1 | 0.2 |
| 10.5 | 16.1 | 0.1 | 1.1 |
| 10.7 | 16.4 | 0.2 | 0.1 |
| 10.4 | 16.5 | 0.9 | 2   |
| 8.9  | 16.4 | 0   | 3.7 |
| 9    | 16.5 | 0.1 | 0.8 |
| 11.6 | 16.5 | 0.5 | 5.7 |
| 10.6 | 16.2 | 0.2 | 0.9 |
| 9.5  | 15.6 | 0.2 | 1.5 |
| 8.9  | 15.9 | 0.1 | 0.5 |
| 10.4 | 16.2 | 0   | 0.3 |
| 11.4 | 16.3 | 0   | 0.2 |
| 9.2  | 15.9 | 0.4 | 0.4 |
| 10.2 | 16.1 | 0.1 | 0.6 |
| 13.9 | 16.3 | 0.2 | 0.4 |
| 11.3 | 16.4 | 0.3 | 0.3 |
| 11.5 | 16.7 | 0.2 | 0   |
| 9.2  | 15.7 | 0.7 | 0.9 |
| 9.8  | 16.2 | 0.3 | 2.6 |
| 10.5 | 16   | 0   | 0   |
| 12.3 | 16.8 | 0.1 | 0.1 |
| 13.8 | 16.6 | 0.5 | 2.4 |
| 10.7 | 15.9 | 0.1 | 0.2 |
| 10.8 | 16.3 | 0.5 | 2.1 |
| 12.7 | 16.7 | 0.4 | 1.2 |
| 11.2 | 16   | 0.4 | 4.5 |
| 15.1 | 16.6 | 0.7 | 0.6 |
| 10.3 | 16.2 | 0.6 | 1.8 |
| 10.6 | 16.4 | 0.4 | 4.2 |
| 9.5  | 15.9 | 0.3 | 1.1 |
| 9.4  | 16   | 0.5 | 1.3 |
| 8.5  | 16.2 | 0.3 | 0.2 |
| 11   | 16.7 | 0.3 | 1.2 |
| 9.9  | 16.2 | 0.2 | 3.8 |
| 12.8 | 16.4 | 0.9 | 1.1 |
| 14   | 24   | 0.2 | 0.5 |
| 13   | 19   | 0.3 | 1.7 |
| 11   | 15   | 0.6 | 2.4 |
| 12   | 17   | 0.4 | 0.2 |
| 12   | 14   | 0.2 | 0.2 |
| 12   | 15   | 0.2 | 2.1 |
| 14   | 21   | 0.4 | 1.8 |
| 11   | 14   | 0.2 | 2   |
| 14   | 20   | 0.5 | 4   |
| 9    | 16   | 0.2 | 4.9 |
| 13   | 14   | 0.3 | 0   |

|      |      |     |     |
|------|------|-----|-----|
| 11   | 13   | 0.4 | 1.2 |
| 10   | 12   | 0.3 | 0.6 |
| 11   | 15   | 0.3 | 1.3 |
| 13   | 20   | 0.4 | 2.3 |
| 11   | 11   | 0.3 | 3.5 |
| 11   | 12   | 0.9 | 2   |
| 10   | 12   | 0.4 | 1.5 |
| 12   | 14   | 0.1 | 0.1 |
| 13   | 17   | 0.2 | 1.9 |
| 12   | 16   | 0.6 | 0.4 |
| 10   | 12   | 0.3 | 0   |
| 12   | 16   | 0.2 | 0.8 |
| 12   | 13   | 0.5 | 0.7 |
| 10   | 11   | 0.2 | 0   |
| 10   | 12   | 0.7 | 2.4 |
| 11   | 12   | 0.6 | 0.6 |
| 12   | 17   | 0.4 | 2.2 |
| 11   | 12   | 0.2 | 0.7 |
| 11   | 14   | 0.3 | 0.3 |
| 11   | 11   | 0.1 | 0.1 |
| 11   | 11   | 0.2 | 0.2 |
| 9    | 16   | 0   | 0.4 |
| 11   | 14   | 0.2 | 0.5 |
| 11   | 14   | 0.9 | 0.5 |
| 10   | 10   | 0.3 | 0   |
| 9.4  | 10.5 | 0   | 1   |
| 9.5  | 15.9 | 0   | 0   |
| 9.5  | 10.8 | 1   | 2   |
| 8    | 16   | 0   | 2   |
| 10   | 16   | 0   | 0   |
| 11.3 | 16.4 | 0   | 2   |
| 10   | 16.7 | 0   | 1   |
| 10.7 | 16.5 | 1   | 1   |
| 9    | 16   | 1   | 2   |
| 11   | 15   | 1   | 1   |
| 12.2 | 17.4 | 1   | 3   |
| 10.8 | 12.6 | 0   | 2   |
| 13.5 | 19.5 | 0   | 0   |
| 10.1 | 11.6 | 0   | 0   |
| 8.9  | 8.8  | 2   | 9   |
| 10.4 | 16.6 | 0   | 7   |
| 10.2 | 16   | 0   | 2   |
| 11.6 | 13.6 | 0   | 2   |
| 12.1 | 12.9 | 1   | 15  |
| 9    | 16   | 0   | 2   |
| 13.5 | 21.6 | 0.6 | 0.4 |
| 11.2 | 14.2 | 0.4 | 0.6 |
| 11   | 13.3 | 0.6 | 0.6 |
| 11.3 | 13.1 | 0.4 | 1.1 |
| 11.4 | 13.9 | 0.4 | 1.7 |
| 10.8 | 12.5 | 0.2 | 0.3 |

|      |      |     |     |
|------|------|-----|-----|
| 10.5 | 11.8 | 0.3 | 0.2 |
| 10.2 | 11.2 | 0.4 | 1.2 |
| 11.1 | 13.8 | 0.5 | 0.8 |
| 10.5 | 12.6 | 0.5 | 0   |
| 9.9  | 10.2 | 0   | 0   |
| 11.2 | 13.8 | 0   | 0.4 |
| 11.5 | 14.8 | 0.5 | 0   |
| 12.2 | 16.7 | 0   | 0   |
| 12.6 | 17.7 | 0   | 1.6 |
| 11   | 15   | 0.3 | 1.3 |
| 12   | 14   | 0.2 | 0.4 |
| 10   | 11   | 0.4 | 0.4 |
| 11   | 15   | 0.3 | 1.3 |
| 11   | 14   | 0.6 | 6.7 |
| 11   | 14   | 0.3 | 1.3 |
| 11   | 17   | 0   | 2.7 |
| 11   | 12   | 0   | 0   |
| 10.5 | 13   | 0   | 0   |
| 9.4  | 10.7 | 0   | 1   |
| 8    | 16   | 1   | 1   |
| 8.2  | 15.5 | 1   | 6   |
| 11.3 | 16.3 | 1   | 4   |
| 9.3  | 10.9 | 0   | 6   |
| 9.3  | 10.3 | 1   | 3   |
| 10.2 | 16.2 | 0   | 0   |
| 9.1  | 10.4 | 0   | 4   |
| 10.7 | 12.7 | 0   | 0   |



| <b>Eosinophil cells</b> | <b>Basophil count</b> |   |
|-------------------------|-----------------------|---|
| 0                       | 0                     | 0 |
| 0                       | 0                     | 0 |
| 0                       | 0                     | 0 |
| 0.03                    | 0                     | 0 |
| 0                       | 0                     | 0 |
| 0.03                    | 0                     | 0 |
| 0                       | 0                     | 0 |
| 0.04                    | 0                     | 0 |
| 0                       | 0                     | 0 |
| 0                       | 0                     | 0 |
| 0.09                    | 0                     | 0 |
| 0                       | 0                     | 0 |
| 0                       | 0                     | 0 |
| 0.16                    | 0                     | 0 |
| 0.07                    | 0                     | 0 |
| 0.02                    | 0                     | 0 |
| 0.04                    | 0                     | 0 |
| 0.04                    | 0                     | 0 |
| 0                       | 0                     | 0 |
| 0                       | 0                     | 0 |
| 0                       | 0                     | 0 |
| 0                       | 0                     | 0 |
| 0                       | 0                     | 0 |
| 0                       | 0                     | 0 |
| 0.01                    | 0                     | 0 |
| 0.01                    | 0                     | 0 |
| 0.06                    | 0                     | 0 |
| 0.12                    | 0                     | 0 |
| 0.11                    | 0                     | 0 |
| 0.1                     | 0                     | 0 |
| 0.09                    | 0                     | 0 |
| 0                       | 0                     | 0 |
| 0.01                    | 0                     | 0 |
| 0                       | 0                     | 0 |
| 0.03                    | 0                     | 0 |
| 0.04                    | 0                     | 0 |
| 0                       | 0                     | 0 |
| 0.06                    | 0                     | 0 |
| 0.06                    | 0                     | 0 |
| 0.01                    | 0                     | 0 |
| 0.17                    | 0                     | 0 |
| 0.1                     | 0                     | 0 |
| 0.04                    | 0                     | 0 |
| 0.03                    | 0                     | 0 |
| 0.1                     | 0                     | 0 |
| 0.04                    | 0                     | 0 |
| 0.11                    | 0                     | 0 |
| 0.01                    | 0                     | 0 |
| 0                       | 0                     | 0 |

|      |      |
|------|------|
| 0.08 | 0.02 |
| 0.09 | 0    |
| 0.05 | 0    |
| 0.1  | 0    |
| 0.04 | 0    |
| 0.02 | 0    |
| 0.14 | 0    |
| 0.01 | 0    |
| 0.07 | 0    |
| 0.17 | 0    |
| 0.04 | 0    |
| 0.24 | 0    |
| 0.07 | 0    |
| 0.07 | 0    |
| 0.06 | 0    |
| 0.02 | 0    |
| 0.02 | 0    |
| 0.04 | 0    |
| 0.02 | 0    |
| 0.02 | 0    |
| 0.02 | 0    |
| 0    | 0    |
| 0.03 | 0    |
| 0.09 | 0    |
| 0    | 0    |
| 0.01 | 0    |
| 0.23 | 0    |
| 0.03 | 0    |
| 0.11 | 0    |
| 0.05 | 0    |
| 0.29 | 0    |
| 0.02 | 0    |
| 0.15 | 0.1  |
| 0.26 | 0    |
| 0.07 | 0    |
| 0.09 | 0    |
| 0.01 | 0    |
| 0.07 | 0    |
| 0.35 | 0    |
| 0.05 | 0    |
| 0.02 | 0.01 |
| 0.11 | 0.02 |
| 0.13 | 0.03 |
| 0.02 | 0.05 |
| 0.01 | 0.01 |
| 0.09 | 0.01 |
| 0.13 | 0.03 |
| 0.16 | 0.02 |
| 0.23 | 0.03 |
| 0.01 | 0.3  |
| 0    | 0.05 |

|      |      |
|------|------|
| 0.08 | 0.03 |
| 0.05 | 0.02 |
| 0.08 | 0.02 |
| 0.12 | 0.02 |
| 0.12 | 0.01 |
| 0.13 | 0.06 |
| 0.12 | 0.03 |
| 0.01 | 0.01 |
| 0.1  | 0.01 |
| 0.03 | 0.04 |
| 0    | 0.02 |
| 0.13 | 0.04 |
| 0.03 | 0.02 |
| 0    | 0.02 |
| 0.21 | 0.06 |
| 0.02 | 0.02 |
| 0.12 | 0.02 |
| 0.03 | 0.01 |
| 0.01 | 0.01 |
| 0.02 | 0.02 |
| 0.01 | 0.01 |
| 0.06 | 0    |
| 0.03 | 0.01 |
| 0.03 | 0.05 |
| 0    | 0.01 |
| 0.08 | 0.01 |
| 0.02 | 0.03 |
| 0.21 | 0.05 |
| 0.18 | 0.03 |
| 0    | 0.01 |
| 0.1  | 0.02 |
| 0.1  | 0.02 |
| 0.08 | 0.04 |
| 0.07 | 0.02 |
| 0.05 | 0.03 |
| 0.15 | 0.04 |
| 0.16 | 0.03 |
| 0    | 0.02 |
| 0.01 | 0.01 |
| 0.38 | 0.08 |
| 0.25 | 0.01 |
| 0.1  | 0.01 |
| 0.2  | 0.02 |
| 0.01 | 0.03 |
| 0.12 | 0    |
| 0.02 | 0    |
| 0.03 | 0    |
| 0.02 | 0    |
| 0.05 | 0    |
| 0.09 | 0    |
| 0.02 | 0    |

|      |      |
|------|------|
| 0.02 | 0    |
| 0.07 | 0    |
| 0.03 | 0    |
| 0    | 0    |
| 0    | 0    |
| 0.01 | 0    |
| 0    | 0    |
| 0    | 0    |
| 0.03 | 0    |
| 0.08 | 0.02 |
| 0.02 | 0.01 |
| 0.02 | 0.02 |
| 0.08 | 0.02 |
| 0.64 | 0.06 |
| 0.05 | 0.01 |
| 0.35 | 0    |
| 0    | 0    |
| 0    | 0    |
| 0.07 | 0.02 |
| 0.17 | 0.09 |
| 0.3  | 0.07 |
| 0.14 | 0.02 |
| 0.38 | 0.02 |
| 0.17 | 0.05 |
| 0    | 0.01 |
| 0.15 | 0.01 |
| 0.04 | 0.01 |
